# Supplementary material for: Heterolytic Splitting of Molecular Hydrogen by Frustrated and Classical Lewis Pairs: A Unified Reactivity Concept
Source: PubMed Central journal article supplement (PMC5700139; doi:10.1038/s41598-017-16244-1), 2017-11-22
Supplement: 41598_2017_16244_MOESM1_ESM.pdf [file 41598_2017_16244_MOESM1_ESM.pdf]

# Supporting Information

## Heterolytic Splitting of Molecular Hydrogen by Frustrated and Classical Lewis Pairs: a Unified Reactivity Concept

*Gabriella Skara<sup>a</sup>, Freija De Vleeschouwer<sup>a,\*</sup>, Paul Geerlings<sup>a</sup>, Frank De Proft<sup>a</sup> and  
Balazs Pinter<sup>a,\*</sup>*

<sup>a</sup>Eenheid Algemene Chemie (ALGC), Member of the QCMM VUB-UGent Alliance  
Research Group, Vrije Universiteit Brussel (VUB), Pleinlaan 2, B-1050 Brussels,  
Belgium.

E-mail: pbalazs@vub.ac.be and fdevlees@vub.ac.be

### Contents:

|                                                                      |    |
|----------------------------------------------------------------------|----|
| I. QTAIM analysis of transition states.....                          | 2  |
| II. NCI analysis of transition states.....                           | 3  |
| III. NCI analysis of ion-pair products.....                          | 4  |
| IV. MO analysis of transition states.....                            | 5  |
| V. NRT analysis of transition states.....                            | 6  |
| VI. Assessing the exterior like feature of the “cavity” of FLPs..... | 7  |
| VII. Laplacian along the H–H bond in TSs.....                        | 8  |
| Table S1. PBE-D3/TZ2P-ZORA level of theory results.....              | 9  |
| Table S2. Wiberg bond indices in TSs.....                            | 9  |
| Table S3. Electron density values at the BCPs of TSs.....            | 9  |
| Table S4. Laplacian values at the BCPs of TSs.....                   | 9  |
| Table S5. Bader charges in TSs.....                                  | 10 |
| Table S6. NBO charges in TSs.....                                    | 10 |
| VIII. Cartesian coordinates.....                                     | 11 |

I. QTAIM analysis of TSs at  $\omega$ B97x-D/cc-pVTZ level of theory.

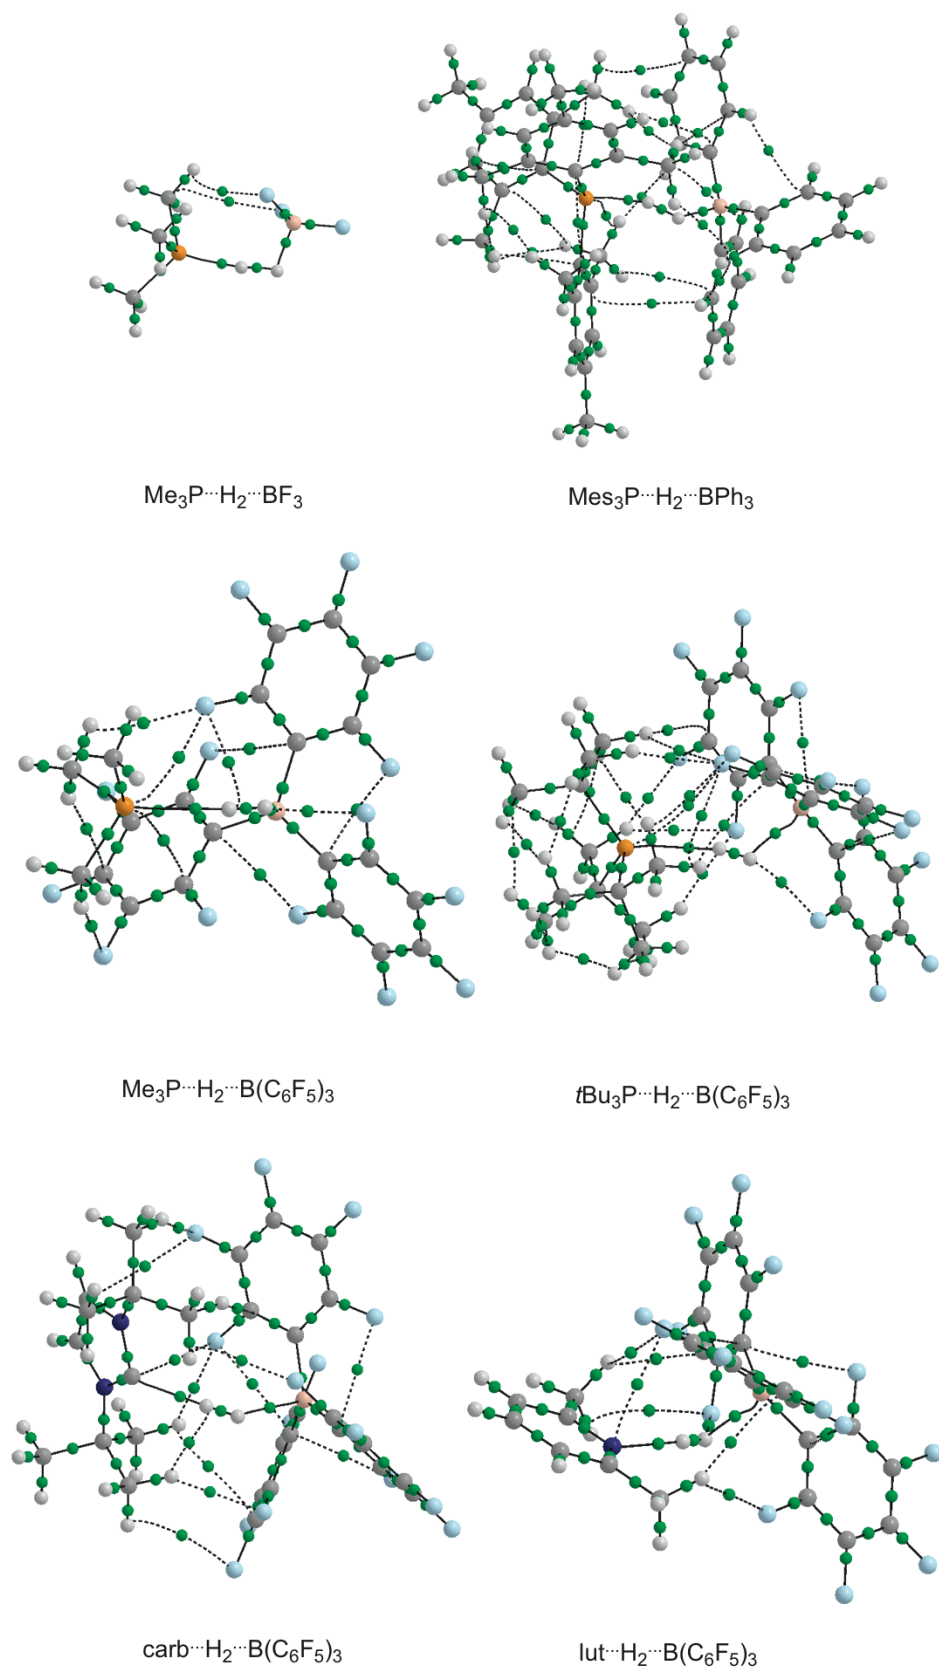

**Figure S1.** Bond critical points (BCPs, green) and bond paths (lines) in the studied transition states revealed using the AIMAll program. (Version 14.06.21, Todd A. Keith, TK Gristmill Software, Overland Park KS, USA, 2014, <http://aim.tkgristmill.com>)

## II. NCI-plots of transition states

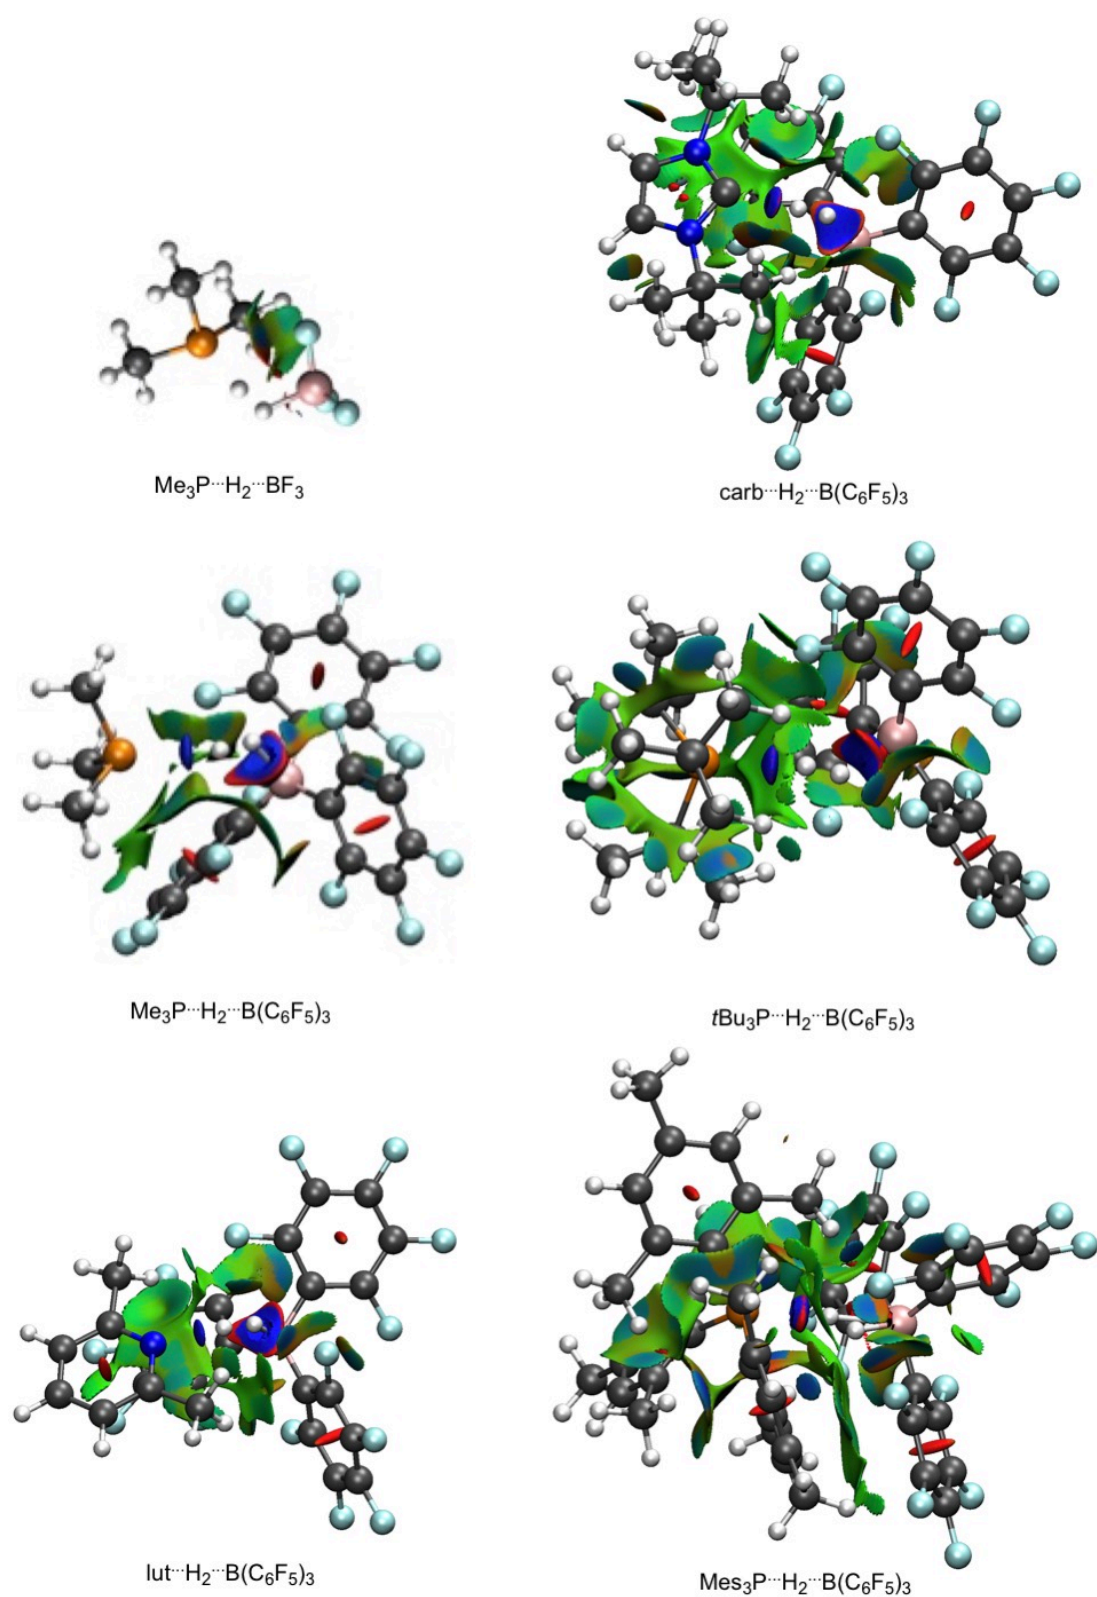

**Figure S2.** Plots of reduced density gradient isosurfaces with  $s = 0.5$  coloured with  $\text{sign}(\lambda_2)\rho$  (red – positive (repulsive), blue – negative (attractive)) for the investigated transition states.

### III. NCI-plots of ion-pair products

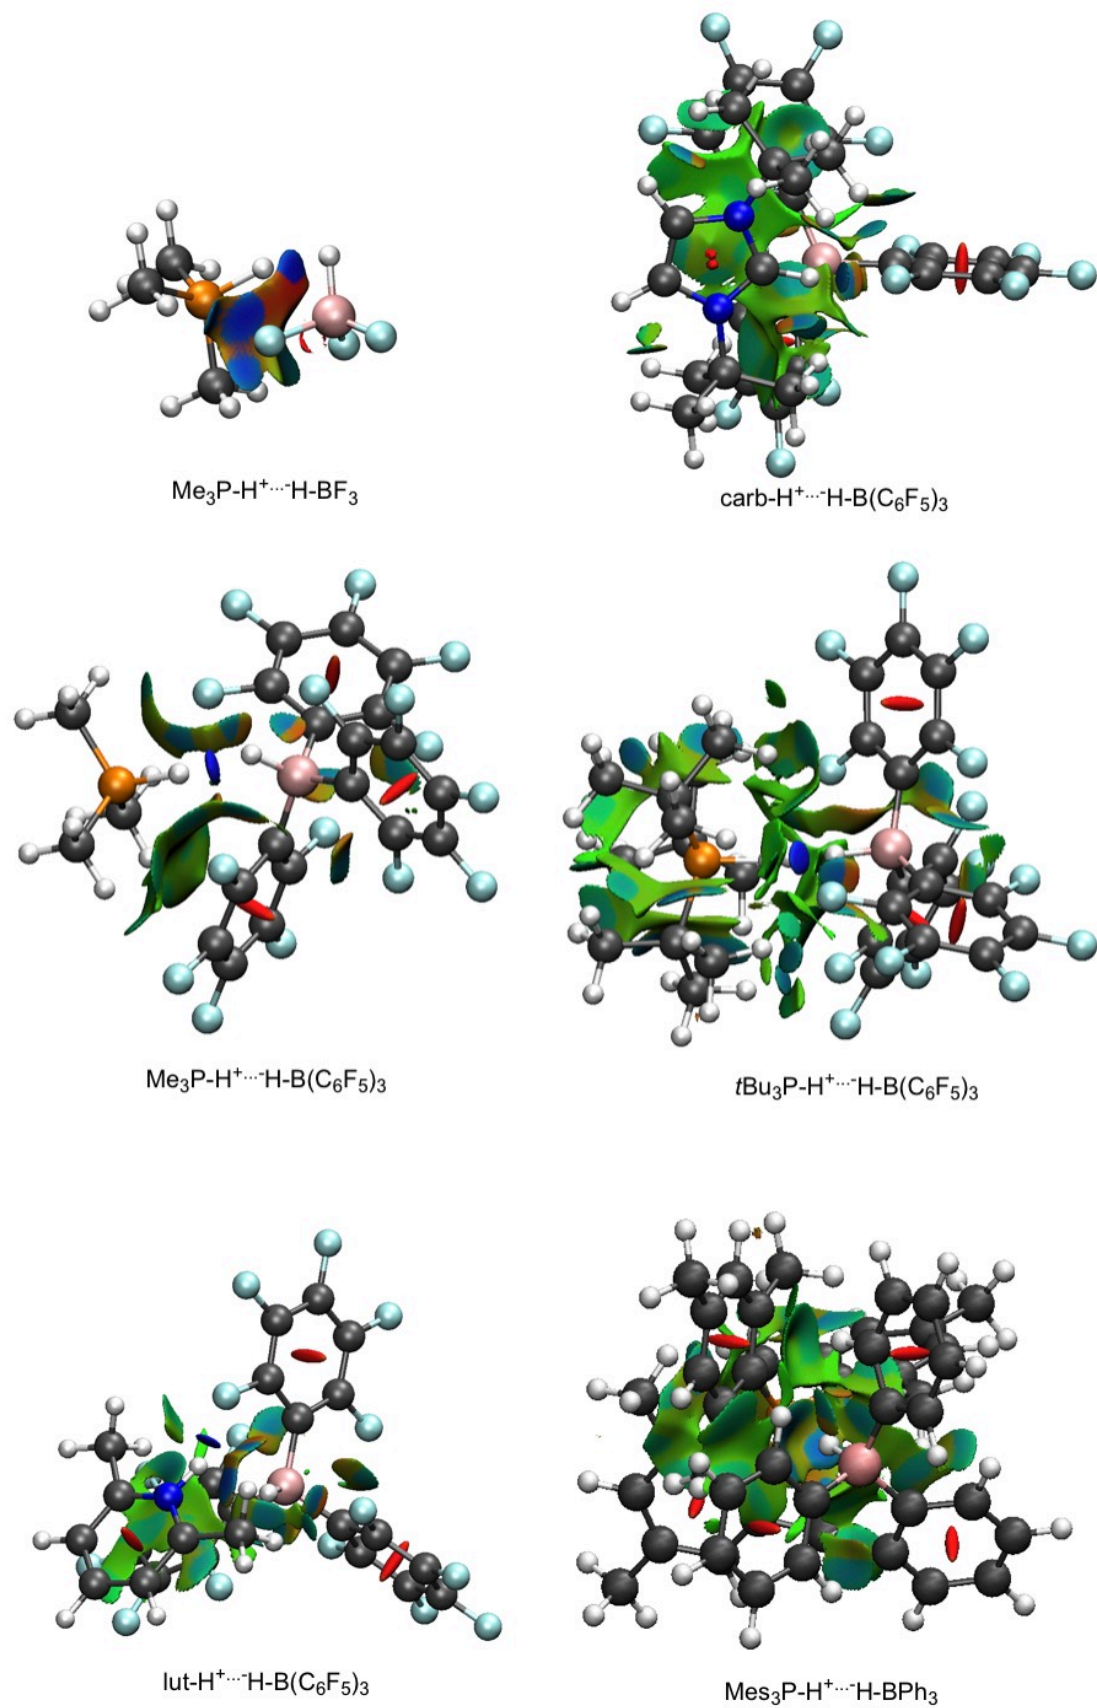

**Figure S3.** Plots of reduced density gradient isosurfaces with  $s = 0.5$  coloured with  $\text{sign}(\lambda_2)\rho$  (red – positive (repulsive), blue – negative (attractive)) for the investigated ion-pair products.

#### IV. MOs of the transition states of $\text{Me}_3\text{P-BF}_3$ (high energy) and $\text{Me}_3\text{P-B}(\text{C}_6\text{F}_5)_3$ (low energy)

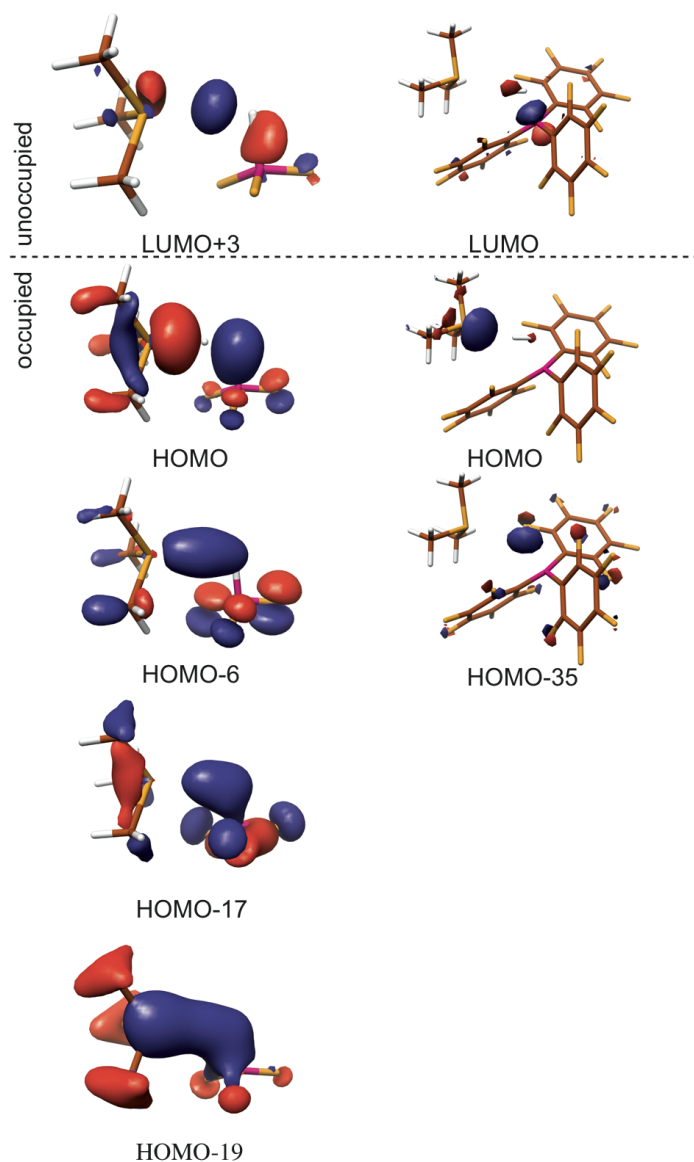

**Figure S4.** Relevant MOs of the late TS of  $\text{Me}_3\text{P-BF}_3$  (left) and early TS of  $\text{Me}_3\text{P-B}(\text{C}_6\text{F}_5)_3$  (right).

We believe that the actual MOs for late TSs in Figure S4 can be more intuitively interpreted from the product fragment MOs, than using the reactant fragment orbitals. Accordingly, HOMO of TS- $\text{Me}_3\text{P-BF}_3$  might be interpreted as the antibonding bonding combination of an almost formed P-H and B-H bonds, whereas their bonding combination might be best represented by HOMO-6 and HOMO-17 (mixed in with the lone pair representing p orbitals of F's). One of the corresponding antibonding combinations is LUMO+3. "Cooperation" might be seen, according to our interpretation, as the effect of delocalization of the occupied MOs (e.g. HOMO, HOMO-17 and HOMO-19) along the base-H-H-acid core, which of course could not evolve without the presence of *both* the acid and base.

In contrast, in Figure S4, one also can clearly recognize the fragment orbitals in the MOs of early TSs (right), such as the empty p orbital at boron (LUMO), the lone pair of P (HOMO) and  $s(\text{H}_2)$  (HOMO-25) in the case of  $\text{Me}_3\text{P-B}(\text{C}_6\text{F}_5)_3$ . As such, again, the electronic structure between early and late TSs is strikingly different as shown by these sets of MOs.

## V. Natural Resonance Theory analysis of the TSs of $\text{Me}_3\text{P-BF}_3$ and $\text{Me}_3\text{P-B}(\text{C}_6\text{F}_5)_3$

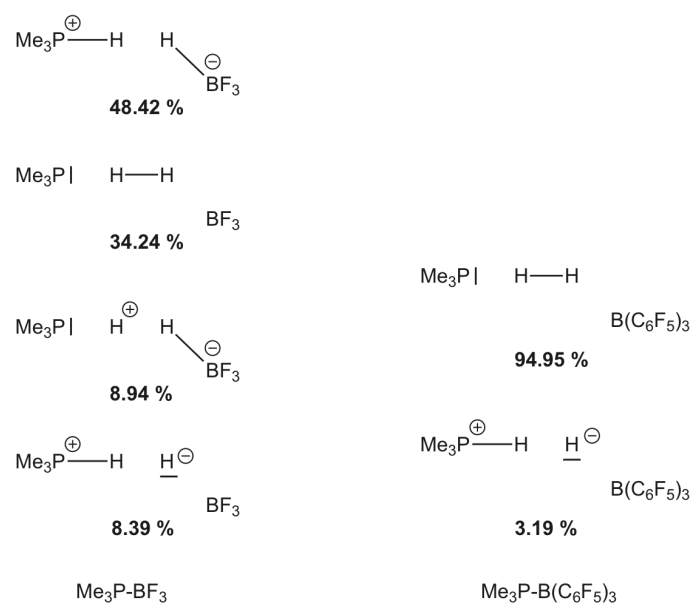

Figure S5. “Local” Natural Resonance Theory (NRT) analysis for the late TS of  $\text{Me}_3\text{P-BF}_3$  (left) and early TS of  $\text{Me}_3\text{P-B}(\text{C}_6\text{F}_5)_3$  (right).

We carried out a “local” Natural Resonance Theory (NRT) analysis for the HE-TS of  $\text{Me}_3\text{P-BF}_3$  (Figure S5, left) and LE-TS of  $\text{Me}_3\text{P-B}(\text{C}_6\text{F}_5)_3$  (right) using the implementation of this technique in NBO6 code allowing confined, i.e. „local“ NRT analysis. This NRT analysis is confined to the P–H–H–B moiety, while the many possible Lewis structure “variations” to describe the electron density accurately around the substituents is not considered. On the one hand, the early LE-TS of  $\text{Me}_3\text{P-B}(\text{C}_6\text{F}_5)_3$  is dominantly represented as a virtual sum of reactant Lewis structures with very minor contribution (3%) from a Lewis extreme that might be rationalized as representing base-to- $\text{H}_2$  donation and/or polarization. In contrast, the reactant-like Lewis structure represents only 34% of the overall structure for late HE-TS of  $\text{Me}_3\text{P-BF}_3$ , adding to the leading (48%) product-like Lewis structure. Some contribution (~9%) is also revealed from two structures that might be needed to characterize base to  $\text{H}_2$  and  $\text{H}_2$  to acid donations and charge transfer-induced polarization at the central  $\text{H}_2$  in late TSs.

## VI. Assessing the exterior like feature of the “cavity” of FLPs.

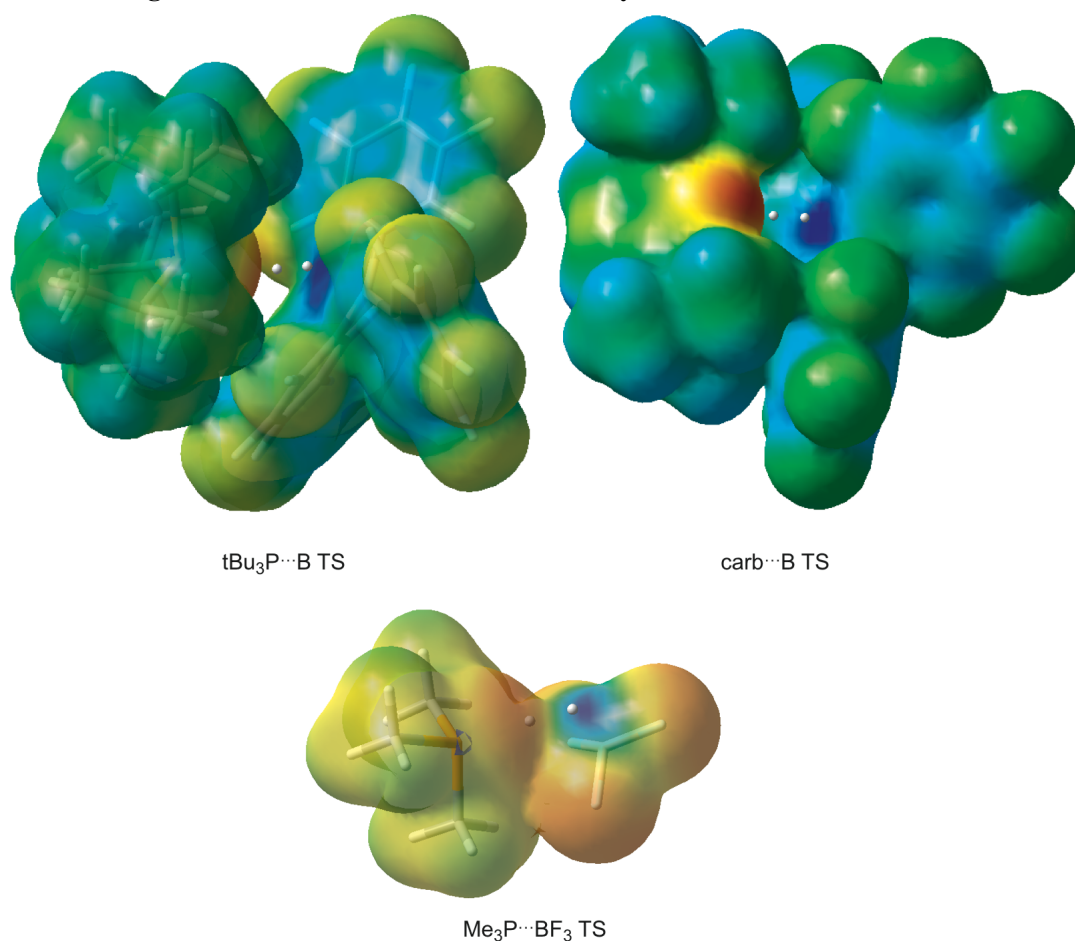

**Figure S6.** Molecular electrostatic potential surfaces plotted on electron density isosurfaces of 0.005 a.u. showing the “exterior-like” cavity in early TSs (top), implying the validity of approximating the electrostatic effects with MEP derived ChelpG charges. The same surface is plotted for a high-energy TS (bottom), where this approximation is not valid.

With Figure S6 we aim to provide support that the cavity in early TSs have exterior-like properties and using ChelpG charges is a rough, but not incorrect, way of approximating the electrostatic effect of Lewis base and acid centers. For these plots we used the relaxed wavefunction of acid...base at the transition state geometry without the presence of H<sub>2</sub>, ensuring practically no interaction between acid and base. The position of H<sub>2</sub> is then showed as in the TSs. The density isosurface selected for these plots is one of its used typical values of 0.005 a.u. mapped with the electrostatic potential. According to the revealed plots (Figure S6, top) we believe that it is realistic to use ChelpG charges for early TSs to approximate the effect of the *intrinsic* force field on H<sub>2</sub> polarization, which excludes the effect of any charge transfer.

## VII. Laplacian of the electron density in the B–H–H plane for low- and high-energy TSs.

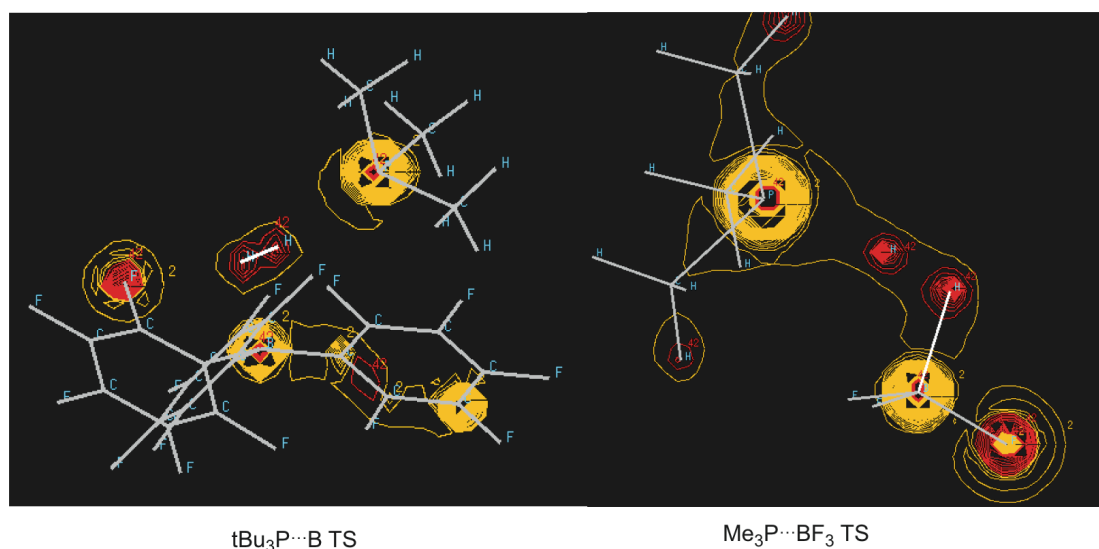

Figure S7. Laplacian of the electron density ( $-\nabla^2\rho$ ) in the B–H–H plane for a low-energy ( $\text{Me}_3\text{P}-\text{B}(\text{C}_6\text{F}_5)_3$ , left) and for a high-energy ( $\text{Me}_3\text{P}-\text{BF}_3$ , right) TS.

Figure S7 shows the Laplacian in the B–H–H plane for a low-energy and a high-energy transition state using the same technical setup with contour line steps of 0.5 a.u.. Charge accumulation (red,  $-\nabla^2\rho < 0$ ) is apparent around the H centers in both structures, however, the charge accumulation is much more pronounced at the hydrogen centers in high-energy TSs, and much less in the internuclear region. Beyond polarization, this finding somewhat implies the formal involvement of  $\sigma^*(\text{H}_2)$ , as the antibonding combinations of MOs are typically more localized on the nuclei and much less in the internuclear region.



**Table S1.** Activation energy, pair formation energy, reaction energy and separation energy computed at the PBE-D3/TZ2P-ZORA level of theory in kcal mol<sup>-1</sup>.

|                                     | $\Delta E_{\text{PF}}$ | $\Delta E^{\ddagger}$ | $\Delta E_{\text{r}}$ | $\Delta E_{\text{sep}}$ |
|-------------------------------------|------------------------|-----------------------|-----------------------|-------------------------|
| Me <sub>3</sub> P–BF <sub>3</sub>   | -17.6                  | 22.5                  | 19.7                  | 93.8                    |
| Me <sub>3</sub> P–B                 | -30.3                  | 22.2                  | 10.6                  | 74.7                    |
| lut–B                               | -12.8                  | 6.1                   | -13.8                 | 76.0                    |
| carb•B                              | -9.2                   | -3.7                  | -48.7                 | 68.4                    |
| <i>t</i> Bu <sub>3</sub> P•B        | -10.6                  | 0.4                   | -21.2                 | 69.0                    |
| Mes <sub>3</sub> P•BPh <sub>3</sub> | -12.5                  | 14.4                  | 11.7                  | 69.4                    |

**Table S2.** Wiberg indices computed for acid···H base···H and H···H interactions in the transition states at the wB97X-D/cc-pVTZ level of theory. Note the characteristic differences between high-energy (Me<sub>3</sub>P–BF<sub>3</sub> and Mes<sub>3</sub>P•BPh<sub>3</sub>) and low-energy TSs.

|                                                                           | base···H | H···H | acid···H |
|---------------------------------------------------------------------------|----------|-------|----------|
| Me <sub>3</sub> P–BF <sub>3</sub>                                         | 0.792    | 0.121 | 0.729    |
| Me <sub>3</sub> P–B(C <sub>6</sub> F <sub>5</sub> ) <sub>3</sub>          | 0.106    | 0.690 | 0.235    |
| lut–B(C <sub>6</sub> F <sub>5</sub> ) <sub>3</sub>                        | 0.071    | 0.724 | 0.210    |
| carb•B(C <sub>6</sub> F <sub>5</sub> ) <sub>3</sub>                       | 0.138    | 0.752 | 0.147    |
| <i>t</i> Bu <sub>3</sub> P•B(C <sub>6</sub> F <sub>5</sub> ) <sub>3</sub> | 0.113    | 0.747 | 0.173    |
| Mes <sub>3</sub> P•BPh <sub>3</sub>                                       | 0.454    | 0.373 | 0.493    |

**Table S3.** Electron density values at the BCPs of acid···H, H···H and H···base interactions in the transition states (see Figure S1). Note the characteristic differences between high-energy (Me<sub>3</sub>P–BF<sub>3</sub> and Mes<sub>3</sub>P•BPh<sub>3</sub>) and low-energy TSs.

| $\rho(\text{BCP})$                                                        | base···H | H···H | acid···H |
|---------------------------------------------------------------------------|----------|-------|----------|
| Me <sub>3</sub> P–BF <sub>3</sub>                                         | 0.10     | 0.15  | 0.10     |
| Me <sub>3</sub> P–B(C <sub>6</sub> F <sub>5</sub> ) <sub>3</sub>          | 0.03     | 0.24  | 0.05     |
| lut–B(C <sub>6</sub> F <sub>5</sub> ) <sub>3</sub>                        | 0.03     | 0.24  | 0.04     |
| carb•B(C <sub>6</sub> F <sub>5</sub> ) <sub>3</sub>                       | 0.04     | 0.23  | 0.03     |
| <i>t</i> Bu <sub>3</sub> P•B(C <sub>6</sub> F <sub>5</sub> ) <sub>3</sub> | 0.03     | 0.24  | 0.04     |
| Mes <sub>3</sub> P•BPh <sub>3</sub>                                       | 0.09     | 0.15  | 0.09     |

**Table S4.** Laplacian values at the BCP of acid···H, H···H and H···base interactions in the transition states. Note the characteristic differences between high-energy (Me<sub>3</sub>P–BF<sub>3</sub> and Mes<sub>3</sub>P•BPh<sub>3</sub>) and low-energy TSs.

| $-\nabla^2\rho(\text{BCP})$                                               | base···H | H···H | acid···H |
|---------------------------------------------------------------------------|----------|-------|----------|
| Me <sub>3</sub> P–BF <sub>3</sub>                                         | -0.14    | -0.35 | -0.08    |
| Me <sub>3</sub> P–B(C <sub>6</sub> F <sub>5</sub> ) <sub>3</sub>          | 0.04     | -0.96 | 0.03     |
| lut–B(C <sub>6</sub> F <sub>5</sub> ) <sub>3</sub>                        | 0.07     | -0.98 | 0.04     |
| carb•B(C <sub>6</sub> F <sub>5</sub> ) <sub>3</sub>                       | 0.05     | -0.91 | 0.04     |
| <i>t</i> Bu <sub>3</sub> P•B(C <sub>6</sub> F <sub>5</sub> ) <sub>3</sub> | 0.04     | -0.96 | 0.04     |
| Mes <sub>3</sub> P•BPh <sub>3</sub>                                       | -0.11    | -0.39 | 0.06     |

**Table S5.** Bader charge at the base center, H1 (closer to the base), H2 and the acid center given in  $e$ . In brackets are given the change of these charges with respect to free reactants to monitor charge transfers.

|                                                                           | base<br>center  | H1             | H2               | acid<br>center  |
|---------------------------------------------------------------------------|-----------------|----------------|------------------|-----------------|
| Me <sub>3</sub> P–BF <sub>3</sub>                                         | 1.65<br>(0.15)  | 0.25<br>(0.25) | -0.45<br>(-0.45) | 2.36<br>(-0.12) |
| Me <sub>3</sub> P–B(C <sub>6</sub> F <sub>5</sub> ) <sub>3</sub>          | 1.46<br>(-0.04) | 0.16<br>(0.16) | -0.13<br>(-0.13) | 1.93<br>(-0.09) |
| lut–B(C <sub>6</sub> F <sub>5</sub> ) <sub>3</sub>                        | -1.10<br>(0.08) | 0.20<br>(0.20) | -0.16<br>(-0.16) | 1.94<br>(-0.08) |
| carb•B(C <sub>6</sub> F <sub>5</sub> ) <sub>3</sub>                       | 0.69<br>(-0.06) | 0.19<br>(0.19) | -0.19<br>(-0.19) | 1.95<br>(-0.07) |
| <i>t</i> Bu <sub>3</sub> P•B(C <sub>6</sub> F <sub>5</sub> ) <sub>3</sub> | 0.86<br>(-0.01) | 0.15<br>(0.15) | -0.15<br>(-0.15) | 1.94<br>(-0.08) |
| Mes <sub>3</sub> P•BPh <sub>3</sub>                                       | 1.59<br>(0.09)  | 0.21<br>(0.21) | -0.39<br>(-0.39) | 1.85<br>(-0.14) |

**Table S6.** NBO charge at the base center, H1 (closer to the base), H2 and the acid center given in  $e$ . In brackets are given the change of these charges with respect to free reactants to monitor charge transfers.

|                                                                           | base<br>center   | H1             | H2               | acid<br>center  |
|---------------------------------------------------------------------------|------------------|----------------|------------------|-----------------|
| Me <sub>3</sub> P–BF <sub>3</sub>                                         | 1.05<br>(0.28)   | 0.12<br>(0.12) | -0.16<br>(-0.16) | 1.16<br>(-0.25) |
| Me <sub>3</sub> P–B(C <sub>6</sub> F <sub>5</sub> ) <sub>3</sub>          | 0.82<br>(0.05)   | 0.17<br>(0.17) | -0.01<br>(-0.01) | 0.66<br>(-0.47) |
| lut–B(C <sub>6</sub> F <sub>5</sub> ) <sub>3</sub>                        | -0.50<br>(-0.03) | 0.20<br>(0.20) | -0.05<br>(-0.05) | 0.72<br>(-0.41) |
| carb•B(C <sub>6</sub> F <sub>5</sub> ) <sub>3</sub>                       | 0.12<br>(0.05)   | 0.16<br>(0.16) | -0.12<br>(-0.12) | 0.81<br>(-0.32) |
| <i>t</i> Bu <sub>3</sub> P•B(C <sub>6</sub> F <sub>5</sub> ) <sub>3</sub> | 0.84<br>(0.05)   | 0.15<br>(0.15) | -0.07<br>(-0.07) | 0.76<br>(-0.37) |
| Mes <sub>3</sub> P•BPh <sub>3</sub>                                       | 1.05<br>(0.22)   | 0.20<br>(0.20) | -0.12<br>(-0.12) | 0.45<br>(-0.42) |

## VIII. Cartesian coordinates of optimized structures

|                                                |             |             |             |
|------------------------------------------------|-------------|-------------|-------------|
| =====                                          |             |             |             |
| B(C <sub>6</sub> F <sub>5</sub> ) <sub>3</sub> |             |             |             |
| =====                                          |             |             |             |
| B                                              | 0.00037300  | -0.00013900 | 0.00082100  |
| C                                              | -0.64120500 | 1.43056000  | 0.00121100  |
| C                                              | -0.10107500 | 2.48235500  | -0.74498600 |
| C                                              | -1.78633200 | 1.72746200  | 0.74649400  |
| C                                              | -0.66191900 | 3.75133100  | -0.76580900 |
| F                                              | 0.98028200  | 2.28163500  | -1.50267000 |
| C                                              | -2.36117400 | 2.99014500  | 0.76588100  |
| F                                              | -2.35637900 | 0.78695200  | 1.50419300  |
| C                                              | -1.79536600 | 4.00406200  | -0.00011000 |
| F                                              | -0.13089600 | 4.72104700  | -1.50314800 |
| F                                              | -3.43943600 | 3.23861800  | 1.50185400  |
| F                                              | -2.33725500 | 5.21204400  | -0.00106400 |
| C                                              | 1.56005300  | -0.15997000 | 0.00082100  |
| C                                              | 2.20077700  | -1.15506300 | -0.74346200 |
| C                                              | 2.38970500  | 0.68437400  | 0.74471700  |
| C                                              | 3.58025800  | -1.30376400 | -0.76432000 |
| F                                              | 1.48628700  | -1.99324900 | -1.49885100 |
| C                                              | 3.77075000  | 0.55103900  | 0.76416000  |
| F                                              | 1.85972500  | 1.64908600  | 1.50110700  |
| C                                              | 4.36601100  | -0.44673600 | -0.00071400 |
| F                                              | 4.15442700  | -2.25041400 | -1.49937900 |
| F                                              | 4.52514700  | 1.36144400  | 1.49913400  |
| F                                              | 5.68308000  | -0.58136200 | -0.00128600 |
| C                                              | -0.91812500 | -1.27083500 | 0.00062100  |
| C                                              | -0.60284100 | -2.41132100 | 0.74526500  |
| C                                              | -2.09949100 | -1.32820600 | -0.74483400 |
| C                                              | -1.40931900 | -3.54033300 | 0.76464300  |
| F                                              | 0.49656900  | -2.43475600 | 1.50312200  |
| C                                              | -2.91855400 | -2.44808800 | -0.76574300 |
| F                                              | -2.46615700 | -0.29084000 | -1.50186000 |
| C                                              | -2.57054700 | -3.55666000 | -0.00098300 |
| F                                              | -1.08579000 | -4.59871200 | 1.50035100  |
| F                                              | -4.02458100 | -2.47212200 | -1.50209700 |
| F                                              | -3.34629800 | -4.62952800 | -0.00176600 |
| =====                                          |             |             |             |
| BF <sub>3</sub>                                |             |             |             |
| =====                                          |             |             |             |
| B                                              | 0.00000000  | 0.00000000  | 0.00000000  |
| F                                              | 0.00000000  | 1.32172700  | 0.00000000  |
| F                                              | 1.14464900  | -0.66086400 | 0.00000000  |
| F                                              | -1.14464900 | -0.66086400 | 0.00000000  |
| =====                                          |             |             |             |
| BPh <sub>3</sub>                               |             |             |             |
| =====                                          |             |             |             |
| C                                              | -1.94906800 | 1.58369500  | 0.66164000  |
| C                                              | -0.72052000 | 1.39432500  | -0.00021900 |
| C                                              | -0.16473600 | 2.50639600  | -0.66179200 |
| C                                              | -0.80870600 | 3.74127900  | -0.67636500 |
| C                                              | -2.01742100 | 3.90309600  | 0.00031500  |
| C                                              | -2.58418800 | 2.82313700  | 0.67672500  |
| B                                              | 0.00020900  | -0.00002700 | -0.00033200 |
| C                                              | 1.56812100  | -0.07314600 | -0.00024100 |
| C                                              | 2.25317900  | -1.11069000 | -0.66165000 |
| C                                              | 3.64459400  | -1.17069300 | -0.67618500 |
| C                                              | 4.38926500  | -0.20483800 | 0.00029600  |
| C                                              | 3.73754200  | 0.82622800  | 0.67646200  |
| C                                              | 2.34658000  | 0.89613900  | 0.66137600  |
| C                                              | -0.84718100 | -1.32124100 | -0.00029700 |
| C                                              | -2.08819600 | -1.39547900 | -0.66183400 |
| C                                              | -2.83608500 | -2.57034000 | -0.67643500 |
| C                                              | -2.37228600 | -3.69823300 | 0.00016900  |
| C                                              | -1.15358100 | -3.64956500 | 0.67654300  |
| C                                              | -0.39733700 | -2.48007900 | 0.66149400  |
| H                                              | 0.56102300  | -2.45778200 | 1.18602300  |
| H                                              | -0.78933900 | -4.52894600 | 1.21141000  |
| H                                              | -2.96202400 | -4.61735000 | 0.00039000  |
| H                                              | -3.78742600 | -2.60582900 | -1.21100900 |
| H                                              | -2.46744100 | -0.51505400 | -1.18633100 |
| H                                              | 1.68067900  | -1.87946700 | -1.18631800 |
| H                                              | 4.15117600  | -1.97677700 | -1.21065600 |
| =====                                          |             |             |             |
| H                                              | 5.48013300  | -0.25578300 | 0.00053600  |
| H                                              | 4.31679000  | 1.58162800  | 1.21116000  |
| H                                              | 1.84787700  | 1.71491700  | 1.18574000  |
| H                                              | 0.78728300  | 2.39496800  | -1.18649800 |
| H                                              | -0.36415500 | 4.58306200  | -1.21100200 |
| H                                              | -2.51893300 | 4.87318300  | 0.00050800  |
| H                                              | -3.52793100 | 2.94703200  | 1.21156900  |
| H                                              | -2.40862100 | 0.74239000  | 1.18612600  |
| =====                                          |             |             |             |
| carb                                           |             |             |             |
| =====                                          |             |             |             |
| C                                              | -0.00000100 | -0.55713400 | -0.00002200 |
| C                                              | 0.67748900  | 1.62425600  | -0.01354600 |
| H                                              | 1.36558200  | 2.46104600  | -0.02654400 |
| C                                              | -0.67750000 | 1.62425300  | 0.01351800  |
| H                                              | -1.36560800 | 2.46102800  | 0.02654200  |
| N                                              | 1.06556300  | 0.29189800  | -0.02661200 |
| N                                              | -1.06555800 | 0.29189300  | 0.02657000  |
| C                                              | 2.45685400  | -0.22152400 | 0.00150800  |
| C                                              | -2.45685300 | -0.22151900 | -0.00149800 |
| C                                              | -3.44973000 | 0.92532400  | 0.19456700  |
| H                                              | -4.46906400 | 0.51390300  | 0.21740400  |
| H                                              | -3.27777500 | 1.45095400  | 1.14628700  |
| H                                              | -3.40613500 | 1.65538600  | -0.62785700 |
| C                                              | -2.68793900 | -0.88884500 | -1.36216000 |
| H                                              | -3.70416300 | -1.30855100 | -1.41983900 |
| H                                              | -2.56556500 | -0.15691500 | -2.17565400 |
| H                                              | -1.95639100 | -1.69540600 | -1.50960000 |
| C                                              | -2.61718600 | -1.24166400 | 1.13028900  |
| H                                              | -1.87074400 | -2.03961900 | 1.02498400  |
| H                                              | -2.46893800 | -0.75845800 | 2.10836800  |
| H                                              | -3.62675300 | -1.67958700 | 1.10467100  |
| C                                              | 2.68794400  | -0.88874700 | 1.36222000  |
| H                                              | 2.56560900  | -0.15675400 | 2.17565800  |
| H                                              | 1.95638100  | -1.69527900 | 1.50971500  |
| H                                              | 3.70415800  | -1.30848200 | 1.41989500  |
| C                                              | 2.61720000  | -1.24173300 | -1.13021900 |
| H                                              | 2.46889500  | -0.75860100 | -2.10832600 |
| H                                              | 3.62679100  | -1.67960800 | -1.10462900 |
| H                                              | 1.87081800  | -2.03973500 | -1.02485800 |
| C                                              | 3.44971200  | 0.92531900  | -0.19463200 |
| H                                              | 4.46905600  | 0.51391500  | -0.21737100 |
| H                                              | 3.27779200  | 1.45083900  | -1.14641900 |
| H                                              | 3.40607400  | 1.65547200  | 0.62771300  |
| =====                                          |             |             |             |
| lut                                            |             |             |             |
| =====                                          |             |             |             |
| N                                              | 0.00000000  | 0.94494700  | 0.00000200  |
| C                                              | 1.15339500  | 0.26536700  | -0.00610800 |
| C                                              | 1.19792200  | -1.13240800 | -0.00869600 |
| C                                              | 0.00000000  | -1.83861500 | -0.00000100 |
| C                                              | -1.19792200 | -1.13240800 | 0.00869600  |
| C                                              | -1.15339500 | 0.26536800  | 0.00611100  |
| C                                              | 2.40992300  | 1.09431500  | 0.00355300  |
| C                                              | -2.40992300 | 1.09431600  | -0.00355500 |
| H                                              | -0.00000100 | -2.93062600 | -0.00000200 |
| H                                              | 2.15685300  | -1.65285500 | -0.01576000 |
| H                                              | -2.15685300 | -1.65285400 | 0.01576000  |
| H                                              | -2.52021300 | 1.60067700  | -0.97511800 |
| H                                              | -2.35004400 | 1.87799100  | 0.76471700  |
| H                                              | -3.30646300 | 0.48437900  | 0.17329000  |
| H                                              | 2.35006700  | 1.87795100  | -0.76476200 |
| H                                              | 2.52018400  | 1.60072700  | 0.97509400  |
| H                                              | 3.30646900  | 0.48437000  | -0.17323600 |
| =====                                          |             |             |             |
| Me <sub>3</sub> P                              |             |             |             |
| =====                                          |             |             |             |
| P                                              | -0.00001000 | -0.00007900 | -0.60597900 |
| C                                              | -1.43195600 | -0.78357100 | 0.28033500  |
| H                                              | -1.32656500 | -0.72424100 | 1.37638800  |
| H                                              | -2.36622800 | -0.28223800 | -0.01530500 |
| H                                              | -1.51152800 | -1.84158500 | -0.01296700 |
| C                                              | 0.03728700  | 1.63177800  | 0.28034700  |

|   |             |             |             |
|---|-------------|-------------|-------------|
| H | -0.84001600 | 2.22890700  | -0.01213500 |
| H | 0.03752700  | 1.511135400 | 1.37647600  |
| H | 0.93780500  | 2.19072700  | -0.01693600 |
| C | 1.39460600  | -0.84814000 | 0.28039000  |
| H | 1.29084300  | -0.78690600 | 1.37650900  |
| H | 2.35027000  | -0.38739900 | -0.01312500 |
| H | 1.42842300  | -1.90782800 | -0.01566000 |

*t*Bu<sub>3</sub>P

|   |             |             |             |
|---|-------------|-------------|-------------|
| P | 0.00048000  | -0.00075800 | -0.71963900 |
| C | -1.26359000 | -1.27526300 | -0.00435000 |
| C | 1.73747700  | -0.45704100 | -0.00453400 |
| C | -0.47318700 | 1.73110800  | -0.00470200 |
| C | 0.70067800  | 2.70326600  | -0.21901900 |
| H | 0.35015400  | 3.72995000  | -0.01999500 |
| H | 1.54294800  | 2.51348200  | 0.45849900  |
| H | 1.07042800  | 2.67613600  | -1.25543600 |
| C | -0.89355900 | 1.80059400  | 1.47030900  |
| H | -1.08226800 | 2.85291100  | 1.74670000  |
| H | -1.82114900 | 1.24706500  | 1.66823100  |
| H | -0.11842600 | 1.41601500  | 2.14653100  |
| C | -1.61741500 | 2.27675800  | -0.88527100 |
| H | -1.81208300 | 3.32870100  | -0.61433200 |
| H | -1.34536300 | 2.24699300  | -1.95138900 |
| H | -2.55960300 | 1.73157300  | -0.76235300 |
| C | 2.00446300  | -0.13106700 | 1.47144200  |
| H | 3.01236500  | -0.48659700 | 1.74919700  |
| H | 1.97969700  | 0.94852300  | 1.67160500  |
| H | 1.28590000  | -0.61663900 | 2.14500500  |
| C | 1.99309000  | -1.95860800 | -0.22441000 |
| H | 1.79345900  | -2.25791800 | -1.26478200 |
| H | 3.05557100  | -2.17122100 | -0.01807200 |
| H | 1.40076900  | -2.59710400 | 0.44332200  |
| C | 2.78247000  | 0.26572300  | -0.88075400 |
| H | 2.62087100  | 0.05103100  | -1.94798700 |
| H | 2.77895700  | 1.35345700  | -0.75102900 |
| H | 3.79110900  | -0.09168800 | -0.61091300 |
| C | -1.11032500 | -1.67222400 | 1.47049200  |
| H | -1.92716000 | -2.35968100 | 1.75237100  |
| H | -0.16719900 | -2.20015000 | 1.66507500  |
| H | -1.15953300 | -0.80703100 | 2.14500200  |
| C | -1.16820400 | -2.54011200 | -0.88348500 |
| H | -1.96777300 | -3.24279100 | -0.59247900 |
| H | -1.30436400 | -2.29435700 | -1.94751200 |
| H | -0.21624600 | -3.07182100 | -0.77937500 |
| C | -2.69183300 | -0.74310700 | -0.21735600 |
| H | -2.94815300 | 0.08171300  | 0.45959300  |
| H | -2.85354200 | -0.41067300 | -1.25406700 |
| H | -3.40696200 | -1.55866000 | -0.01699400 |

Mes<sub>3</sub>P

|   |             |             |             |
|---|-------------|-------------|-------------|
| C | -0.16828900 | 2.73216300  | 0.96142100  |
| C | 0.44053900  | 1.67612900  | 0.23644800  |
| C | 1.36772900  | 1.99236700  | -0.78183500 |
| C | 1.67682000  | 3.33526800  | -1.02472500 |
| C | 1.09198900  | 4.38162300  | -0.31731100 |
| C | 0.15811500  | 4.05524500  | 0.66453300  |
| P | -0.00511000 | -0.00705200 | 0.85933100  |
| C | 1.23736600  | -1.22942900 | 0.24252400  |
| C | 2.46003500  | -1.21034000 | 0.96037700  |
| C | 3.45363400  | -2.14299800 | 0.66192400  |
| C | 3.27701200  | -3.12208800 | -0.31380500 |
| C | 2.07255800  | -3.12685300 | -1.01228800 |
| C | 1.05307400  | -2.20104000 | -0.76699400 |
| C | 2.75014700  | -0.17674700 | 2.02105700  |
| C | 4.34449400  | -4.14858300 | -0.58669100 |
| C | -0.16893300 | -2.27917500 | -1.64876600 |
| C | 2.02396200  | 0.96982600  | -1.67625000 |
| C | 1.46121900  | 5.81588100  | -0.58930700 |
| C | -1.20631200 | 2.47721600  | 2.02693300  |
| C | -1.68502400 | -0.46106900 | 0.23313200  |
| C | -2.41955700 | 0.18508900  | -0.78551800 |
| C | -3.73932100 | -0.21389000 | -1.02767200 |

|   |             |             |             |
|---|-------------|-------------|-------------|
| C | -4.35701500 | -1.23992500 | -0.31939800 |
| C | -3.61019600 | -1.88638300 | 0.66476600  |
| C | -2.30023400 | -1.51214700 | 0.96061200  |
| C | -5.78295300 | -1.63864600 | -0.59377800 |
| C | -1.85796300 | 1.25997800  | -1.68294300 |
| C | -1.56286300 | -2.27816400 | 2.03174300  |
| H | 2.39335000  | 3.56850900  | -1.81707100 |
| H | -0.33331200 | 4.85652800  | 1.22312500  |
| H | 4.39592800  | -2.10274600 | 1.21503200  |
| H | 1.92032100  | -3.87072700 | -1.79925400 |
| H | -4.29706000 | 0.29117100  | -1.82108200 |
| H | -4.06207300 | -2.70937400 | 1.22540100  |
| H | 2.79040200  | 0.83875100  | 1.59527900  |
| H | 1.96500300  | -0.16203800 | 2.79188800  |
| H | 3.71542700  | -0.37706700 | 2.50534300  |
| H | -1.04913800 | -2.66436500 | -1.11400000 |
| H | -0.45159300 | -1.29349800 | -2.04320000 |
| H | 0.02448200  | -2.94367000 | -2.50205600 |
| H | 5.35104300  | -3.72051700 | -0.47300800 |
| H | 4.26464300  | -4.99124000 | 0.11929500  |
| H | 4.25797700  | -4.55992000 | -1.60247200 |
| H | -0.69378600 | -2.81522800 | 1.61911300  |
| H | -1.17316800 | -1.60349000 | 2.80885500  |
| H | -2.22268000 | -3.01770000 | 2.50520300  |
| H | -1.72970000 | 2.21932300  | -1.16124600 |
| H | -0.87085100 | 0.98560800  | -2.07894100 |
| H | -2.53043600 | 1.42609300  | -2.53562900 |
| H | -5.88629300 | -2.73208900 | -0.65998400 |
| H | -6.44880600 | -1.29648000 | 0.21468300  |
| H | -6.14993300 | -1.20330400 | -1.53370600 |
| H | -2.10961500 | 2.00719800  | 1.60607900  |
| H | -0.82793500 | 1.79099900  | 2.79936700  |
| H | -1.50798200 | 3.41738000  | 2.50796200  |
| H | 1.30223000  | 0.23366600  | -2.05451700 |
| H | 2.48562400  | 1.46709300  | -2.54030200 |
| H | 2.80758200  | 0.39886100  | -1.15680500 |
| H | 0.58009200  | 6.47279400  | -0.54454900 |
| H | 2.18074800  | 6.18274200  | 0.16065700  |
| H | 1.92593400  | 5.93266800  | -1.57855700 |

H<sub>2</sub>

|   |            |            |             |
|---|------------|------------|-------------|
| H | 0.00000000 | 0.00000000 | 0.37930000  |
| H | 0.00000000 | 0.00000000 | -0.37930000 |

carb-B(C<sub>6</sub>F<sub>5</sub>)<sub>3</sub>

|   |             |             |             |
|---|-------------|-------------|-------------|
| C | -2.04467900 | -0.84452300 | -3.24028300 |
| C | -0.88107300 | -0.31028200 | -2.70623600 |
| C | -0.27467800 | -0.81228700 | -1.54854700 |
| C | -0.91585200 | -1.90321700 | -0.94862700 |
| C | -2.07113400 | -2.46970700 | -1.46536700 |
| C | -2.64481800 | -1.92617200 | -2.60764400 |
| B | 1.04434100  | -0.19490800 | -0.97063700 |
| C | 2.08871700  | -1.11368300 | -0.23754900 |
| C | 2.35361400  | -2.42485300 | -0.64531000 |
| C | 3.22789700  | -3.26246500 | 0.03188100  |
| C | 3.86084000  | -2.79822200 | 1.18039900  |
| C | 3.63372300  | -1.49957700 | 1.61954700  |
| C | 2.78163700  | -0.67940700 | 0.89533500  |
| F | 1.76754600  | -2.91800100 | -1.73929900 |
| F | 2.61257700  | 0.56251800  | 1.35870000  |
| F | 4.22229300  | -1.05602000 | 2.72728300  |
| F | 4.68113300  | -3.59223900 | 1.85171000  |
| F | 3.45843000  | -4.49964700 | -0.39648100 |
| F | -0.33286000 | 0.71296700  | -3.36663700 |
| F | -0.43542300 | -2.44620500 | 0.16855500  |
| F | -2.64481900 | -3.51085400 | -0.86845300 |
| F | -3.77465000 | -2.42935500 | -3.08382800 |
| F | -2.59583000 | -0.32712100 | -4.33481000 |
| C | 1.34240800  | 1.34121200  | -1.11056000 |
| C | 2.62977500  | 1.81980100  | -1.37191000 |
| C | 2.92449900  | 3.17200300  | -1.46852600 |
| C | 1.90818600  | 4.10246000  | -1.28049500 |
| C | 0.61272000  | 3.67308500  | -1.01531400 |

|   |             |             |             |
|---|-------------|-------------|-------------|
| C | 0.34912400  | 2.31215900  | -0.95357600 |
| F | 3.63820000  | 0.96416800  | -1.56350800 |
| F | -0.90775200 | 1.95408800  | -0.69211400 |
| F | -0.35607500 | 4.56386400  | -0.82646700 |
| F | 2.17477800  | 5.39799200  | -1.35555600 |
| F | 4.16084700  | 3.58487600  | -1.73257700 |
| C | -4.53045600 | -1.47494500 | 0.76533700  |
| C | -4.48813300 | 0.05605500  | 0.77857200  |
| C | -3.87947800 | 0.59552800  | -0.51860800 |
| N | -3.62139700 | 0.47824900  | 1.90548700  |
| C | -4.03907800 | 1.11769100  | 3.06276600  |
| C | -2.93504300 | 1.26863400  | 3.83212600  |
| N | -1.88543100 | 0.70148300  | 3.12262800  |
| C | -2.28391200 | 0.20990100  | 1.91526100  |
| C | -0.45931700 | 0.75503000  | 3.52184000  |
| C | -0.34135200 | 0.95839300  | 5.03453400  |
| C | -5.89998700 | 0.61669000  | 0.95253900  |
| C | 0.18784400  | 1.93070900  | 2.78140300  |
| C | 0.20968800  | -0.56738400 | 3.13922800  |
| H | -2.83366200 | 1.72178100  | 4.81087100  |
| H | -5.06276700 | 1.41169300  | 3.26046800  |
| H | -5.03489900 | -1.85657100 | 1.66641900  |
| H | -5.06987700 | -1.84500100 | -0.12027500 |
| H | -3.50923900 | -1.87543900 | 0.75657400  |
| H | -5.89712900 | 1.71610500  | 1.00422000  |
| H | -6.50811800 | 0.32191200  | 0.08510400  |
| H | -6.39318100 | 0.21840400  | 1.85200400  |
| H | -4.46265200 | 0.25048500  | -1.38688200 |
| H | -3.87144600 | 1.69588200  | -0.51503100 |
| H | -0.31264200 | 2.87464100  | 3.04770700  |
| H | 1.25535600  | 2.01411100  | 3.03077000  |
| H | 0.08449500  | 1.78324000  | 1.69850500  |
| H | 1.27980000  | -0.52474300 | 3.39183300  |
| H | -0.24976200 | -1.40433900 | 3.68636000  |
| H | 0.08850800  | -0.76769100 | 2.06782100  |
| H | -0.89109600 | 0.18104700  | 5.58659300  |
| H | 0.71825500  | 0.89501000  | 5.32102200  |
| H | -0.70768300 | 1.94574800  | 5.35284900  |
| H | -2.84181000 | 0.25509000  | -0.61248700 |

lut-B(C<sub>6</sub>F<sub>5</sub>)<sub>3</sub>

|   |             |             |             |
|---|-------------|-------------|-------------|
| N | 0.44667900  | -0.44695500 | 2.03085200  |
| B | 0.18074100  | -0.10172300 | 0.40844800  |
| F | -1.74298000 | -2.12236500 | 1.78106700  |
| F | -3.68522100 | -3.43035600 | 0.56022900  |
| F | -4.07460800 | -3.17119500 | -2.12751400 |
| F | -2.44128100 | -1.52405800 | -3.56436800 |
| F | -0.48678600 | -0.18070900 | -2.35880700 |
| F | 2.42116200  | 1.52325200  | 1.18665900  |
| F | 4.90800000  | 1.46506100  | 0.26675500  |
| F | 5.61525900  | -0.29511400 | -1.69872400 |
| F | 3.74896100  | -2.02313400 | -2.67739900 |
| F | 1.29168300  | -2.03735400 | -1.74266000 |
| F | -2.35795300 | 0.70419300  | 1.51805500  |
| F | -3.81925900 | 2.83799700  | 0.87622500  |
| F | -2.84760600 | 4.69609200  | -0.87325900 |
| F | -0.37947300 | 4.34142800  | -1.96758700 |
| F | 1.08233600  | 2.23625000  | -1.36987600 |
| C | -0.96609800 | -1.11317400 | -0.23398000 |
| C | -1.85055000 | -1.94338300 | 0.45111200  |
| C | -2.88669800 | -2.64256600 | -0.16059400 |
| C | -3.09015800 | -2.51096900 | -1.52540400 |
| C | -2.25393400 | -1.67461700 | -2.25455100 |
| C | -1.23311800 | -0.99867300 | -1.60184000 |
| C | 1.69018800  | -0.21815200 | -0.24722500 |
| C | 2.69971300  | 0.62079700  | 0.22614400  |
| C | 4.00774800  | 0.62081700  | -0.23504000 |
| C | 4.36996900  | -0.27035500 | -1.23606100 |
| C | 3.41454600  | -1.14196100 | -1.73625600 |
| C | 2.11504700  | -1.10491900 | -1.23721400 |
| C | -0.55185900 | 1.35003700  | 0.12783700  |
| C | -1.83661800 | 1.57383400  | 0.63004400  |
| C | -2.61720100 | 2.67657000  | 0.32401800  |
| C | -2.12209300 | 3.62758400  | -0.56084900 |

|   |             |             |             |
|---|-------------|-------------|-------------|
| C | -0.86243100 | 3.44566300  | -1.10908700 |
| C | -0.10856400 | 2.32372900  | -0.76655400 |
| C | 0.82671100  | -1.72956500 | 2.33464800  |
| C | 1.18305600  | -2.74684000 | 1.28719500  |
| H | 0.61476000  | -2.67577400 | 0.35974500  |
| H | 1.03849100  | -3.75014600 | 1.70553300  |
| H | 2.24862500  | -2.63490200 | 1.03456700  |
| C | 0.95945100  | -2.15414700 | 3.65192600  |
| H | 1.24189100  | -3.18950100 | 3.83543100  |
| C | 0.73208400  | -1.28180000 | 4.69932200  |
| H | 0.81672300  | -1.60867900 | 5.73634500  |
| C | 0.43085000  | 0.02855500  | 4.38502300  |
| H | 0.29398600  | 0.77133600  | 5.16968800  |
| C | 0.31199600  | 0.44607500  | 3.05951500  |
| C | 0.07115200  | 1.92326700  | 2.89100800  |
| H | 0.51152700  | 2.33729000  | 1.98628400  |
| H | 0.51931800  | 2.43220300  | 3.75381000  |
| H | -1.00503600 | 2.14076300  | 2.90239200  |

Me<sub>3</sub>P-B(C<sub>6</sub>F<sub>5</sub>)<sub>3</sub>

|   |             |             |             |
|---|-------------|-------------|-------------|
| B | 0.00017771  | -0.00082777 | 0.69926292  |
| P | 0.00211430  | 0.00212612  | 4.62630847  |
| C | 1.28420017  | 2.87780933  | 6.04808172  |
| H | 1.59600542  | 2.55395260  | 8.07610935  |
| H | 3.07862512  | 3.36186488  | 5.13288168  |
| H | -0.06331016 | 4.43311538  | 5.80394800  |
| C | 1.85318523  | -2.54081212 | 6.05509071  |
| H | 3.87334439  | -2.15005519 | 5.80935072  |
| H | 1.41726118  | -2.64178004 | 8.08354164  |
| H | 1.37707919  | -4.34067362 | 5.14654251  |
| C | -3.12517194 | -0.32445002 | 6.05764184  |
| H | -2.99346536 | 0.11087682  | 8.08449973  |
| H | -3.79761107 | -2.27000086 | 5.81922265  |
| H | -4.44578418 | 0.98525181  | 5.14539167  |
| C | -2.77559897 | -1.09725921 | -0.12350683 |
| C | 2.33767320  | -1.85594843 | -0.12577639 |
| C | 0.43729856  | 2.95103030  | -0.12603528 |
| C | -1.12028134 | 4.85634686  | 0.81266161  |
| C | -0.90006652 | 7.39632233  | 0.22126425  |
| C | 0.97050856  | 8.14385527  | -1.46288424 |
| C | 2.54385816  | 6.32649617  | -2.50651007 |
| C | 2.24965764  | 3.79447252  | -1.84434625 |
| F | 3.81211083  | 2.18293531  | -3.01201559 |
| F | 4.32365717  | 7.01032222  | -4.14754257 |
| F | 1.23685004  | 10.56473484 | -2.07217163 |
| F | -2.45051869 | 9.10013642  | 1.23738511  |
| F | -3.01769380 | 4.23604570  | 2.41361113  |
| C | -3.65168032 | -3.39513622 | 0.82005610  |
| C | -5.96177609 | -4.47300684 | 0.22686918  |
| C | -7.53950725 | -3.22930113 | -1.46383855 |
| C | -6.74776427 | -0.96140990 | -2.51126840 |
| C | -4.40810061 | 0.04867819  | -1.84696730 |
| F | -3.78980291 | 2.20422916  | -3.01869955 |
| F | -8.22511283 | 0.23591605  | -4.15816472 |
| F | -9.76888673 | -4.20830404 | -2.07549188 |
| F | -6.66720256 | -6.66411676 | 1.24705106  |
| F | -2.16980366 | -4.72604822 | 2.42703385  |
| C | 4.76718234  | -1.46043298 | 0.81172808  |
| C | 6.85609189  | -2.92195781 | 0.21980350  |
| C | 6.56667822  | -4.91622714 | -1.46360801 |
| C | 4.20544294  | -5.36957446 | -2.50583921 |
| C | 2.16065822  | -3.84762180 | -1.84365461 |
| F | -0.01633548 | -4.39486462 | -3.01123513 |
| F | 3.90611652  | -7.25312223 | -4.14628401 |
| F | 8.52911720  | -6.35818891 | -2.07365885 |
| F | 9.10758786  | -2.43155207 | 1.23447871  |
| F | 5.17995321  | 0.49281694  | 2.41279288  |

tBu<sub>3</sub>P-B(C<sub>6</sub>F<sub>5</sub>)<sub>3</sub>

|   |             |            |             |
|---|-------------|------------|-------------|
| C | 0.27456400  | 4.39671500 | -1.27247700 |
| C | -0.69386400 | 3.74739800 | -0.51717100 |
| C | -0.88603200 | 2.38519600 | -0.68979300 |
| C | -0.11381400 | 1.60956800 | -1.55849200 |

|                                     |             |             |             |   |             |             |             |
|-------------------------------------|-------------|-------------|-------------|---|-------------|-------------|-------------|
| C                                   | 0.83478200  | 2.30979500  | -2.31088300 | C | 2.62646100  | 2.24922400  | 1.05238700  |
| C                                   | 1.03541500  | 3.67698300  | -2.18853200 | C | 1.66777900  | 1.75278700  | 0.14139200  |
| B                                   | -0.23919800 | 0.04354900  | -1.60064800 | C | 0.96236900  | 2.67094900  | -0.67848900 |
| C                                   | -1.64284400 | -0.63446000 | -1.39971900 | C | 1.17874000  | 4.04030100  | -0.53149800 |
| C                                   | -1.79330600 | -1.81383600 | -0.66587400 | P | 1.07443000  | 0.00833200  | 0.01103200  |
| C                                   | -3.02924700 | -2.35533700 | -0.34753700 | C | 1.70674600  | -0.75031900 | -1.55005400 |
| C                                   | -4.18198900 | -1.73527000 | -0.81307300 | C | 1.01414800  | -1.92207200 | -1.95011600 |
| C                                   | -4.08304400 | -0.58451100 | -1.58889800 | C | 1.26192000  | -2.48070300 | -3.20321600 |
| C                                   | -2.82970900 | -0.05529800 | -1.86030100 | C | 2.18200400  | -1.92277100 | -4.08997700 |
| F                                   | -3.11552300 | -3.44588900 | 0.41002700  | C | 2.88778200  | -0.80024500 | -3.66593900 |
| F                                   | -0.72537200 | -2.46450700 | -0.19628700 | C | 2.68408500  | -0.20749100 | -2.41386700 |
| F                                   | -5.37148700 | -2.24147100 | -0.52666200 | C | 0.05686800  | -2.63054300 | -1.02892800 |
| F                                   | -5.18468600 | -0.00145800 | -2.05134800 | C | 3.58016300  | 0.95281300  | -2.05391800 |
| F                                   | -2.78929300 | 1.05470400  | -2.60164500 | C | 2.40195300  | -2.52365700 | -5.45373500 |
| F                                   | -1.84063800 | 1.82439300  | 0.05772600  | C | 3.53353200  | 1.37519200  | 1.88410600  |
| F                                   | 1.59483100  | 1.66372700  | -3.19848700 | C | 0.02522900  | 2.20775700  | -1.76197400 |
| F                                   | -1.41388800 | 4.42531700  | 0.37310200  | C | 2.26521600  | 6.03353100  | 0.56985100  |
| F                                   | 1.94758100  | 4.30186800  | -2.92666500 | C | 1.67355900  | -0.96408000 | 1.46297000  |
| F                                   | 0.46810700  | 5.69857000  | -1.12810900 | C | 2.65317300  | -1.98188800 | 1.44708400  |
| C                                   | 1.04378400  | -0.84499100 | -1.78581900 | C | 2.82939800  | -2.77248000 | 2.58916200  |
| C                                   | 1.01294100  | -2.08224800 | -2.43836200 | C | 2.09364300  | -2.58259200 | 3.75552700  |
| C                                   | 2.11005900  | -2.92876800 | -2.50535600 | C | 1.17148400  | -1.53682900 | 3.77480500  |
| C                                   | 3.29940400  | -2.54998100 | -1.89079400 | C | 0.95061800  | -0.72834500 | 2.66072800  |
| C                                   | 3.38371300  | -1.32150900 | -1.24789100 | C | 3.57838400  | -2.24683700 | 0.28414200  |
| C                                   | 2.27476500  | -0.48984300 | -1.22747000 | C | -0.01204100 | 0.42184600  | 2.79235400  |
| F                                   | 4.34993100  | -3.35499100 | -1.92680000 | C | 2.28434800  | -3.46604400 | 4.96066700  |
| F                                   | 2.03454000  | -4.09488700 | -3.13918100 | H | 3.58825900  | -3.55971900 | 2.56431900  |
| F                                   | 4.51232800  | -0.95953700 | -0.64303800 | H | 0.59892000  | -1.34016100 | 4.68570900  |
| F                                   | -0.10561400 | -2.49510600 | -3.03934100 | H | 0.71297000  | -3.38145900 | -3.49221800 |
| F                                   | 2.42796600  | 0.68061000  | -0.60279000 | H | 3.64471900  | -0.36988500 | -4.32780500 |
| C                                   | 2.03372300  | -2.24641300 | 1.90765300  | H | 3.54169300  | 4.00712800  | 1.87979200  |
| C                                   | 1.02927900  | -1.78720900 | 2.98598400  | H | 0.62037500  | 4.72983700  | -1.17105900 |
| P                                   | 0.36648800  | -0.06823100 | 2.40240400  | H | 0.59832700  | -3.15268400 | -0.22237200 |
| C                                   | 1.65254000  | 1.25648700  | 2.97282800  | H | -0.62224200 | -1.91580800 | -0.54532200 |
| C                                   | 1.36450000  | 2.52121800  | 2.13634700  | H | -0.54918700 | -3.36607900 | -1.57491500 |
| C                                   | -0.09646000 | -2.83837900 | 2.97287600  | H | 3.06355300  | 1.92199300  | -2.11404300 |
| C                                   | 1.69777400  | -1.84146700 | 4.36792700  | H | 3.96545100  | 0.86766500  | -1.02860800 |
| C                                   | -1.26547600 | 0.27055300  | 3.38002400  | H | 4.43995300  | 0.98724800  | -2.73757000 |
| C                                   | -1.63655700 | 1.76374800  | 3.31373400  | H | 2.53199200  | -3.61486600 | -5.39275200 |
| C                                   | -1.29454000 | -0.15024100 | 4.85739200  | H | 1.53686100  | -2.33457900 | -6.10990000 |
| C                                   | -2.38245200 | -0.46624100 | 2.61106200  | H | 3.29064300  | -2.10054200 | -5.94288900 |
| C                                   | 3.08089200  | 0.82706400  | 2.58895400  | H | 0.58408900  | 1.77927700  | -2.61077100 |
| C                                   | 1.66097800  | 1.61882800  | 4.46543600  | H | -0.64284300 | 1.41937600  | -1.39057800 |
| H                                   | 0.35867100  | -3.83404600 | 3.10866500  | H | -0.59295700 | 3.03596400  | -2.13391600 |
| H                                   | 1.98588600  | -2.88367800 | 4.59014600  | H | 3.02094400  | 0.94169200  | 2.75551400  |
| H                                   | 2.42204800  | -3.24460600 | 2.17312600  | H | 3.93032500  | 0.53101600  | 1.30406200  |
| H                                   | -0.81928600 | -2.70446600 | 3.78719800  | H | 4.38490400  | 1.96393400  | 2.25337600  |
| H                                   | -0.63924600 | -2.85843700 | 2.02044200  | H | 2.39335000  | 6.53075000  | -0.40366000 |
| H                                   | 1.02414500  | -1.50948500 | 5.16911400  | H | 1.38534500  | 6.48714000  | 1.05433200  |
| H                                   | -1.18256500 | -1.23295200 | 4.99464800  | H | 3.14331600  | 6.26407400  | 1.18940900  |
| H                                   | 2.61257700  | -1.23831100 | 4.42230000  | H | 0.52669400  | 1.38186700  | 2.85821100  |
| H                                   | 1.53914300  | -2.32727300 | 0.92836800  | H | -0.66873200 | 0.48497100  | 1.91439900  |
| H                                   | -2.24635300 | -1.55363300 | 2.57537500  | H | -0.64123500 | 0.31326000  | 3.68603300  |
| H                                   | 2.89694100  | -1.57869600 | 1.80006700  | H | 3.96006600  | -1.31474100 | -0.15404600 |
| H                                   | -2.26909000 | 0.13040400  | 5.29342900  | H | 4.43892100  | -2.84259800 | 0.61924300  |
| H                                   | -0.51470900 | 0.34918300  | 5.44781800  | H | 3.08600200  | -2.79676700 | -0.53151800 |
| H                                   | -3.35182600 | -0.27217000 | 3.10138000  | H | 2.39825000  | -2.86963600 | 5.87867700  |
| H                                   | 3.46234700  | 0.00197900  | 3.20317300  | H | 1.41284000  | -4.12481400 | 5.10595300  |
| H                                   | -2.44830700 | -0.09552400 | 1.57771800  | H | 3.17235100  | -4.10525500 | 4.85625000  |
| H                                   | 1.86041000  | 0.74750600  | 5.10311200  | C | -2.96701600 | -2.91539800 | -3.34036800 |
| H                                   | 3.16286100  | 0.54545000  | 1.53238700  | C | -2.35116500 | -1.67099100 | -3.46569700 |
| H                                   | 3.75559400  | 1.68492000  | 2.74938300  | C | -2.44272400 | -0.74442000 | -2.43049100 |
| H                                   | 0.72000000  | 2.07463700  | 4.79763200  | C | -3.11806600 | -1.04076300 | -1.23082900 |
| H                                   | 2.46018000  | 2.35647600  | 4.65433800  | C | -3.72404100 | -2.30791700 | -1.13056500 |
| H                                   | -2.66398700 | 1.88301500  | 3.69721500  | C | -3.66333000 | -3.22969700 | -2.17283100 |
| H                                   | -0.98888700 | 2.39574600  | 3.93399000  | B | -3.14730300 | -0.02236400 | -0.03425200 |
| H                                   | -1.62842800 | 2.15231800  | 2.28824700  | C | -3.14964000 | 1.52352100  | -0.31773200 |
| H                                   | 1.45122200  | 2.30093800  | 1.06222800  | C | -2.50371100 | 2.42954700  | 0.54553000  |
| H                                   | 0.37245800  | 2.95140600  | 2.31831600  | C | -2.44104000 | 3.79118500  | 0.26161200  |
| H                                   | 2.10915700  | 3.29761100  | 2.38220600  | C | -3.05648800 | 4.29059600  | -0.88528400 |
| =====                               |             |             |             |   |             |             |             |
| Mes <sub>3</sub> P-BPh <sub>3</sub> |             |             |             |   |             |             |             |
| =====                               |             |             |             |   |             |             |             |
| C                                   | 2.07950200  | 4.54782800  | 0.40415200  | C | 2.62646100  | 2.24922400  | 1.05238700  |
| C                                   | 2.79891200  | 3.63388100  | 1.16903500  | C | 1.66777900  | 1.75278700  | 0.14139200  |

|                                                                                              |             |             |              |                                                                                             |             |             |             |
|----------------------------------------------------------------------------------------------|-------------|-------------|--------------|---------------------------------------------------------------------------------------------|-------------|-------------|-------------|
| C                                                                                            | -3.07065000 | -1.43942000 | 4.12735400   | H                                                                                           | -5.23716700 | -2.82974400 | -0.86035800 |
| C                                                                                            | -2.42641600 | -2.16814600 | 3.12852700   | H                                                                                           | -3.98184900 | -4.07553400 | -0.90097900 |
| C                                                                                            | -2.48451700 | -1.73482300 | 1.80669400   | H                                                                                           | -3.91296800 | -2.79514600 | 0.33239400  |
| H                                                                                            | -4.26884300 | 1.38509400  | -2.16453200  | H                                                                                           | -3.19691300 | -1.78032600 | -3.81568800 |
| H                                                                                            | -4.21261500 | 3.80782800  | -2.64472600  | H                                                                                           | -3.79332200 | -3.41710500 | -3.41081200 |
| H                                                                                            | -3.01694000 | 5.35925500  | -1.10753400  | H                                                                                           | -4.85938100 | -1.99991200 | -3.20549700 |
| H                                                                                            | -1.90516200 | 4.46238400  | 0.93508400   | H                                                                                           | -1.77676600 | -3.69641000 | -1.87015900 |
| H                                                                                            | -2.01319000 | 2.05745700  | 1.44633200   | H                                                                                           | -1.20995300 | -2.05376300 | -2.27039600 |
| H                                                                                            | -4.32140700 | 1.09205700  | 2.23632100   | H                                                                                           | -1.49737400 | 2.10759700  | -3.57011800 |
| H                                                                                            | -4.27315800 | 0.29798000  | 4.57536700   | H                                                                                           | -0.83593500 | 3.57371500  | -2.78582200 |
| H                                                                                            | -3.03440600 | -1.78001800 | 5.16445400   | H                                                                                           | -0.48745700 | 1.96057400  | -2.12500500 |
| H                                                                                            | -1.87130700 | -3.07378400 | 3.37950000   | H                                                                                           | -1.71112600 | 4.36205000  | -0.55886800 |
| H                                                                                            | -1.97065700 | -2.31672500 | 1.03993300   | H                                                                                           | -3.03374700 | 3.48085600  | 0.24635600  |
| H                                                                                            | -1.95195000 | 0.22322500  | -2.54572500  | H                                                                                           | -1.41729700 | 2.74630100  | 0.14587900  |
| H                                                                                            | -1.79231700 | -1.42242600 | -4.36972600  | H                                                                                           | -4.44051600 | 3.75012600  | -1.87699100 |
| H                                                                                            | -2.90480700 | -3.64234300 | -4.15319700  | H                                                                                           | -3.10366300 | 4.53396400  | -2.73967700 |
| H                                                                                            | -4.15285100 | -4.20053100 | -2.07235100  | H                                                                                           | -3.84998000 | 3.05941700  | -3.41281000 |
| H                                                                                            | -4.25927900 | -2.57353000 | -0.21583900  | H                                                                                           | -1.45848800 | -2.51742200 | -0.57493500 |
| =====                                                                                        |             |             |              | H                                                                                           | -0.58058500 | -0.01416300 | -1.38240200 |
| Me <sub>3</sub> P-BF <sub>3</sub>                                                            |             |             |              | H                                                                                           | 0.18835100  | -0.09343100 | -1.15495400 |
| =====                                                                                        |             |             |              | F                                                                                           | 1.81400400  | 1.87237600  | -1.47605700 |
| C                                                                                            | -1.43742800 | -1.34352700 | 1.02115700   | F                                                                                           | 1.63963000  | 4.52188400  | -1.14935200 |
| H                                                                                            | -1.06298500 | -1.22249300 | 2.04738000   | F                                                                                           | 0.90587200  | 5.55641200  | 1.25446500  |
| C                                                                                            | -1.44141800 | 1.55543800  | 0.65208700   | F                                                                                           | 0.32057600  | 3.89793500  | 3.32883000  |
| H                                                                                            | -2.53657500 | -1.34310200 | 1.02052200   | F                                                                                           | 0.41941500  | 1.24457100  | 3.00176500  |
| H                                                                                            | -1.06268700 | -2.29966200 | 0.62978500   | F                                                                                           | 1.19015000  | -2.44679500 | -1.28336100 |
| H                                                                                            | -1.06779000 | 1.69627900  | 1.67609400   | F                                                                                           | 3.37550700  | -3.42561200 | -2.47378100 |
| H                                                                                            | -1.06888900 | 2.38423100  | 0.03392300   | F                                                                                           | 5.80618500  | -2.30009500 | -2.00520500 |
| H                                                                                            | -2.54057000 | 1.55181100  | 0.65126800   | F                                                                                           | 6.01778200  | -0.16958200 | -0.32837000 |
| C                                                                                            | -1.43919600 | -0.21380800 | -1.67339300  | F                                                                                           | 3.84812800  | 0.83789700  | 0.85138000  |
| H                                                                                            | -1.06916400 | 0.60535000  | -2.30579600  | F                                                                                           | 1.63401500  | -2.83032900 | 1.57551900  |
| H                                                                                            | -1.06154700 | -1.16152100 | -2.08208500  | F                                                                                           | -0.20628100 | -4.44218400 | 2.61953400  |
| H                                                                                            | -2.53834700 | -0.21812700 | -1.67047300  | F                                                                                           | -2.77956100 | -3.59213800 | 2.89813000  |
| P                                                                                            | -0.75160300 | 0.00039200  | 0.00011600   | F                                                                                           | -3.46697700 | -1.07974700 | 2.15562100  |
| B                                                                                            | 1.30332800  | 0.00066700  | -0.00005100  | F                                                                                           | -1.65145200 | 0.55210500  | 1.08536300  |
| F                                                                                            | 1.65381900  | -1.23705400 | -0.52160300  | =====                                                                                       |             |             |             |
| F                                                                                            | 1.65466700  | 0.16730900  | 1.33227300   | lut <sup>-</sup> H <sub>2</sub> <sup>-</sup> B(C <sub>6</sub> F <sub>5</sub> ) <sub>3</sub> |             |             |             |
| F                                                                                            | 1.65531600  | 1.07078800  | -0.81080300  | =====                                                                                       |             |             |             |
| =====                                                                                        |             |             |              | C                                                                                           | -5.07131300 | 0.72799000  | -2.37443600 |
| carb <sup>-</sup> H <sub>2</sub> <sup>-</sup> B(C <sub>6</sub> F <sub>5</sub> ) <sub>3</sub> |             |             |              | C                                                                                           | -4.07222700 | 1.66783200  | -2.59950200 |
| =====                                                                                        |             |             |              | C                                                                                           | -2.73829800 | 1.28303400  | -2.45002200 |
| B                                                                                            | 1.11862800  | -0.12824800 | 0.50172400   | N                                                                                           | -2.40345400 | 0.03008500  | -2.10990800 |
| N                                                                                            | -3.39908100 | -0.74018300 | -1.34143000  | F                                                                                           | -1.88897900 | 1.38691800  | 0.43000500  |
| N                                                                                            | -3.08442000 | 1.37343700  | -1.47054900  | C                                                                                           | -1.87108200 | 0.16108100  | 0.96431200  |
| C                                                                                            | -4.52797300 | -0.14033100 | -0.80440800  | C                                                                                           | -0.69362900 | -0.59272100 | 0.95677100  |
| C                                                                                            | -4.32367100 | 1.19447300  | -0.87492300  | C                                                                                           | -0.77608000 | -1.83605500 | 1.58965200  |
| C                                                                                            | -2.48952400 | 0.18667200  | -1.76067800  | C                                                                                           | -1.95287100 | -2.32137900 | 2.14949200  |
| C                                                                                            | -3.30445500 | -2.18313800 | -1.68367500  | C                                                                                           | -3.10836300 | -1.55307700 | 2.08620200  |
| C                                                                                            | 2.40999800  | -0.74107300 | -0.18709700  | C                                                                                           | -3.06898000 | -0.29809800 | 1.49060400  |
| C                                                                                            | 1.08538800  | 1.43976100  | 0.73568700   | B                                                                                           | 0.61828500  | -0.06096000 | 0.23080100  |
| C                                                                                            | 0.07731000  | -1.06612500 | 1.23991500   | C                                                                                           | 0.98393700  | 1.48764000  | 0.32220800  |
| C                                                                                            | 3.68029000  | -0.20121300 | 0.02586700   | C                                                                                           | 0.75516800  | 2.23907700  | 1.47339200  |
| C                                                                                            | 2.35951300  | -1.84937900 | -1.03500800  | C                                                                                           | 1.09042200  | 3.58341700  | 1.57310300  |
| C                                                                                            | 3.47873900  | -2.37708300 | -1.66100400  | C                                                                                           | 1.67741300  | 4.22193300  | 0.48688200  |
| C                                                                                            | 4.72280000  | -1.80291000 | -1.42358200  | C                                                                                           | 1.93159600  | 3.50908700  | -0.67892400 |
| C                                                                                            | 4.82719400  | -0.71243400 | -0.56978000  | C                                                                                           | 1.59776100  | 2.16261100  | -0.73200100 |
| C                                                                                            | 0.72416400  | 2.01668800  | 1.95329700   | F                                                                                           | 0.29633400  | -2.62478100 | 1.69740500  |
| C                                                                                            | 1.43252300  | 2.33301900  | -0.27944300  | F                                                                                           | -1.98199900 | -3.51387000 | 2.73851400  |
| C                                                                                            | 1.36517700  | 3.71022400  | -0.13010500  | F                                                                                           | -4.16957300 | 0.44603900  | 1.43104600  |
| C                                                                                            | 0.98470900  | 4.24115000  | 1.09607500   | C                                                                                           | 1.80177400  | -1.07026600 | -0.11904700 |
| C                                                                                            | 0.67256900  | 3.39114700  | 2.15001900   | C                                                                                           | 1.58823400  | -2.24118700 | -0.84747800 |
| C                                                                                            | 0.38892200  | -2.35772900 | 1.67351500   | C                                                                                           | 2.60378300  | -3.12550100 | -1.17640600 |
| C                                                                                            | -1.24732500 | -0.66672200 | 1.44850200   | C                                                                                           | 3.90013300  | -2.85624800 | -0.74931200 |
| C                                                                                            | -2.20883900 | -1.49277500 | 2.00814600   | C                                                                                           | 4.15801100  | -1.71252400 | -0.00526200 |
| C                                                                                            | -1.85916700 | -2.78163700 | 2.39166400   | C                                                                                           | 3.11417300  | -0.84310300 | 0.29397400  |
| C                                                                                            | -0.55004900 | -3.21654400 | 2.23403500   | F                                                                                           | 0.35291200  | -2.54665300 | -1.26581500 |
| C                                                                                            | -4.16105600 | -3.00687600 | -0.711660400 | F                                                                                           | 3.41929500  | 0.23117200  | 1.03004900  |
| C                                                                                            | -3.82149900 | -2.35649500 | -3.11780200  | F                                                                                           | 5.39423500  | -1.45865100 | 0.41531400  |
| C                                                                                            | -1.84851600 | -2.63406900 | -1.59459400  | F                                                                                           | 2.35247500  | -4.22366800 | -1.88437200 |
| C                                                                                            | -2.50368100 | 2.71268700  | -1.73402900  | H                                                                                           | -4.31708200 | 2.69379800  | -2.87672000 |
| C                                                                                            | -1.25668400 | 2.57333600  | -2.60452300  | H                                                                                           | -6.12278400 | 1.00391500  | -2.47257200 |
| C                                                                                            | -2.14610900 | 3.36436600  | -0.39374900  | H                                                                                           | -0.55724400 | -0.08988900 | -1.53684800 |
| C                                                                                            | -3.54225200 | 3.55884000  | -2.48224100  | H                                                                                           | 0.22245800  | 0.02371500  | -1.45995400 |
| H                                                                                            | -4.95546400 | 2.01026100  | -0.54232900  | C                                                                                           | -4.71435600 | -0.56970900 | -2.02557500 |
| H                                                                                            | -5.37095600 | -0.68869200 | -0.40277800  | H                                                                                           | -5.47296200 | -1.33204300 | -1.84471200 |

|   |             |             |             |
|---|-------------|-------------|-------------|
| C | -3.35985100 | -0.88794100 | -1.90907000 |
| C | -2.90168800 | -2.27825800 | -1.57030700 |
| H | -3.73354800 | -2.90599800 | -1.22397600 |
| H | -2.45346400 | -2.75359900 | -2.45637600 |
| H | -2.12207400 | -2.25200100 | -0.79829300 |
| C | -1.60927800 | 2.25945900  | -2.63832500 |
| H | -1.95872500 | 3.19337400  | -3.09771800 |
| H | -1.15833900 | 2.50155700  | -1.66379600 |
| H | -0.82019900 | 1.82608200  | -3.26844200 |
| F | 4.88465900  | -3.69386300 | -1.04753000 |
| F | -4.24216500 | -2.01135000 | 2.59949200  |
| F | 2.49475900  | 4.11467400  | -1.72134300 |
| F | 0.85741600  | 4.26195500  | 2.69331300  |
| F | 1.99812700  | 5.50736900  | 0.56396000  |
| F | 0.20782400  | 1.66797100  | 2.55222000  |
| F | 1.87361400  | 1.51037300  | -1.87123300 |

Me<sub>3</sub>P<sup>+</sup>H<sub>2</sub><sup>-</sup>B(C<sub>6</sub>F<sub>5</sub>)<sub>3</sub>

|   |             |             |             |
|---|-------------|-------------|-------------|
| C | 4.69673848  | -1.95978221 | 2.25784292  |
| C | 2.94432362  | -2.08278250 | 0.29515824  |
| C | 3.25813900  | -4.07296649 | -1.40133017 |
| C | 5.17250329  | -5.85512762 | -1.15733062 |
| C | 6.85260967  | -5.67784116 | 0.85245548  |
| C | 6.61638078  | -3.71502608 | 2.58412114  |
| B | 0.79541976  | 0.00768746  | -0.04282117 |
| C | -1.81195070 | -0.86046771 | -1.26655301 |
| C | -2.98156639 | 0.41269564  | -3.25463750 |
| C | -5.20953464 | -0.43045658 | -4.36949466 |
| C | -6.35838998 | -2.61282753 | -3.47200325 |
| C | -5.25949351 | -3.93683397 | -1.48574801 |
| C | -3.02342400 | -3.05628785 | -0.44251903 |
| F | -1.96097433 | 2.50832628  | -4.22528588 |
| F | -6.24740997 | 0.83804104  | -6.27519654 |
| F | -8.49818361 | -3.42472936 | -4.49388210 |
| F | -6.37559422 | -6.00846697 | -0.58538044 |
| F | -2.03733473 | -4.39854714 | 1.45918418  |
| F | 1.72580542  | -4.31215472 | -3.39840408 |
| F | 5.41125876  | -7.71810847 | -2.82817166 |
| F | 8.68233502  | -7.37176530 | 1.11604582  |
| F | 8.22390089  | -3.53375796 | 4.50821006  |
| F | 4.53396134  | -0.07993364 | 3.95324096  |
| C | 1.66523628  | 2.88612393  | -0.26915934 |
| C | 3.97438150  | 3.57842120  | -1.33463417 |
| C | 4.74146304  | 6.08244624  | -1.56496344 |
| C | 3.16754047  | 7.99860783  | -0.70643818 |
| C | 0.83990051  | 7.39560956  | 0.35460902  |
| C | 0.13778020  | 4.87802196  | 0.53221682  |
| F | 5.55394868  | 1.82361765  | -2.23469750 |
| F | 6.95916629  | 6.65229304  | -2.60085651 |
| F | 3.87509185  | 10.39526052 | -0.90352150 |
| F | -0.68207537 | 9.22219058  | 1.17461978  |
| F | -2.13510494 | 4.38697674  | 1.54752510  |
| P | -5.47940829 | 0.20576131  | 4.46011086  |
| H | 0.35255867  | 0.16116726  | 3.13472876  |
| H | -1.14562566 | 0.08747179  | 3.19693476  |
| C | -7.66974253 | 1.73142236  | 2.20908232  |
| H | -7.82092635 | 0.56898947  | 0.49302768  |
| H | -9.56934814 | 1.97870824  | 3.02400781  |
| H | -6.90712078 | 3.58424778  | 1.66170047  |
| C | -5.95865785 | 2.21075320  | 7.27769063  |
| H | -4.98299985 | 1.36701500  | 8.90822760  |
| H | -5.12337046 | 4.08194297  | 6.92489388  |
| H | -7.97581199 | 2.44184602  | 7.73740998  |
| C | -7.28916514 | -2.65178419 | 5.32776160  |
| H | -7.28652148 | -3.98560392 | 3.73434075  |
| H | -6.35996228 | -3.58784874 | 6.93519478  |
| H | -9.25639837 | -2.20748113 | 5.84434848  |

tBu<sub>3</sub>P<sup>+</sup>H<sub>2</sub><sup>-</sup>B(C<sub>6</sub>F<sub>5</sub>)<sub>3</sub>

|   |            |             |             |
|---|------------|-------------|-------------|
| H | 3.38790900 | -3.70821900 | -1.89679600 |
| H | 4.40400800 | -2.48806500 | -3.73539900 |
| H | 1.94719900 | -2.92193000 | -3.50750400 |
| F | 1.45573700 | -3.95281100 | 1.43140900  |

|   |             |             |             |
|---|-------------|-------------|-------------|
| C | 3.35254300  | -2.78276100 | -1.29839600 |
| H | 4.30279500  | -2.71534900 | -0.75438000 |
| H | 2.53772500  | -2.90157500 | -0.57141000 |
| F | -5.40287900 | -2.66595600 | -2.57765800 |
| C | 4.27551100  | -1.50997300 | -3.24046600 |
| H | 5.22656300  | -1.25991000 | -2.75229700 |
| F | -4.84807800 | -3.49913200 | -0.04990100 |
| C | 1.81401500  | -1.94529700 | -3.01232200 |
| H | 5.63296600  | -1.26704800 | -0.57681500 |
| C | 3.10862100  | -1.59622000 | -2.24713300 |
| F | -0.10187600 | -2.49086400 | -0.17750200 |
| H | 4.09480500  | -0.77068000 | -4.03235600 |
| C | 0.88934300  | -2.83857000 | 1.89383600  |
| H | 0.95979400  | -2.03239100 | -2.32656200 |
| F | 1.89265200  | -3.16812400 | 3.99637800  |
| C | -4.47581800 | -2.04307900 | -1.86207200 |
| C | -4.18765600 | -2.46914000 | -0.57175000 |
| H | 3.60807700  | -1.82178400 | 1.05747300  |
| H | 1.55918700  | -1.21928100 | -3.79147200 |
| C | 0.09154200  | -2.05460000 | 1.07407500  |
| H | 6.21861200  | -0.04482100 | 0.56058500  |
| C | 1.12078400  | -2.43730900 | 3.20317200  |
| F | -4.06743900 | -0.54859100 | -3.63776600 |
| C | 5.52970700  | -0.21435400 | -0.28468800 |
| C | -3.79239000 | -0.95844500 | -2.40240300 |
| F | -2.98276400 | -2.25059000 | 1.40276500  |
| C | -3.20789100 | -1.80890000 | 0.16054700  |
| H | 5.87640800  | 0.40755800  | -1.12157000 |
| C | 3.65891300  | -0.75760000 | 1.31714400  |
| H | 4.37768100  | -0.65600200 | 2.14785500  |
| H | 2.53658900  | 0.54402400  | -4.32865200 |
| C | -2.83408100 | -0.31510200 | -1.63377200 |
| C | -2.49619800 | -0.71973300 | -0.34134600 |
| P | 2.73980100  | -0.02063400 | -1.20535400 |
| C | 4.10146000  | 0.14645200  | 0.14845400  |
| C | -0.48789500 | -0.85671600 | 1.49473100  |
| H | 2.66951000  | -0.44865000 | 1.68687300  |
| C | 0.54448800  | -1.26439300 | 3.67471100  |
| H | 4.82676200  | 1.14817100  | -3.26977100 |
| H | 0.44524500  | 0.04092800  | -0.83126200 |
| H | -0.33348200 | 0.12766600  | -0.95279900 |
| F | -2.20143700 | 0.72858600  | -2.18849700 |
| C | -0.24133100 | -0.49999600 | 2.82062300  |
| B | -1.37976300 | 0.01733000  | 0.51525600  |
| F | 0.75056900  | -0.88309500 | 4.93244000  |
| C | 2.04485900  | 1.25006800  | -3.64741400 |
| H | 1.03029500  | 0.88338800  | -3.42958100 |
| C | 4.26900000  | 1.95090100  | -2.76899000 |
| C | 2.85484900  | 1.50954200  | -2.36489400 |
| H | 1.93813900  | 2.20366200  | -4.19084000 |
| H | 4.86430300  | 2.29340700  | -1.91299900 |
| C | 4.12969000  | 1.57406500  | 0.72465900  |
| H | 4.19983700  | 2.79634500  | -3.47510900 |
| F | -0.78395400 | 0.60893400  | 3.33427000  |
| H | 4.79998600  | 1.57701800  | 1.60039600  |
| H | 4.52264500  | 2.31591600  | 0.01838800  |
| H | 3.14148700  | 1.90438900  | 1.06839300  |
| C | -1.43300200 | 1.59432100  | 0.68434500  |
| F | 0.88273500  | 1.66949000  | 1.14944100  |
| F | -3.76836100 | 1.76599400  | 0.29233700  |
| H | 1.06670300  | 2.42354900  | -1.49229400 |
| C | 2.12745400  | 2.66992600  | -1.65365000 |
| H | 2.56247300  | 2.94347900  | -0.68726300 |
| C | -0.27419500 | 2.31899100  | 0.96864000  |
| C | -2.59311900 | 2.35445700  | 0.53081500  |
| H | 2.16334200  | 3.56390700  | -2.29910600 |
| C | -0.23512100 | 3.70036900  | 1.05375000  |
| C | -2.60091600 | 3.74248200  | 0.62859200  |
| F | 0.91128300  | 4.33591000  | 1.28872200  |
| F | -3.73175400 | 4.42576400  | 0.47644600  |
| C | -1.41386700 | 4.41860700  | 0.88165200  |
| F | -1.40460700 | 5.74194800  | 0.96240500  |

Mes<sub>3</sub>P<sup>+</sup>H<sub>2</sub><sup>-</sup>BPh<sub>3</sub>



|   |             |             |             |
|---|-------------|-------------|-------------|
| C | -3.52088600 | -1.37066600 | -0.56891500 |
| C | -3.32995000 | -0.74246500 | 0.67376700  |
| C | -3.96994200 | -1.32742400 | 1.77707400  |
| C | -4.73104800 | -2.49252600 | 1.65673900  |
| C | -4.87786000 | -3.10876300 | 0.41635300  |
| C | -4.27150100 | -2.53518000 | -0.70276400 |
| B | -2.48907200 | 0.63286700  | 0.78450400  |
| C | -1.79176700 | 0.98419400  | 2.19735300  |
| C | -1.55872900 | 2.30878000  | 2.61012300  |
| C | -0.92199400 | 2.61088200  | 3.81461900  |
| C | -0.48156000 | 1.58603200  | 4.64997900  |
| C | -0.67512200 | 0.26164200  | 4.26047600  |
| C | -1.31940100 | -0.02518600 | 3.05779000  |
| C | -3.23315900 | 1.82210700  | -0.01197700 |
| C | -4.13566500 | 2.66502700  | 0.65943000  |
| C | -4.87341400 | 3.64076200  | -0.01047600 |
| C | -4.73396900 | 3.80337600  | -1.38784000 |
| C | -3.86074300 | 2.96939700  | -2.08415700 |
| C | -3.13264800 | 1.99592800  | -1.40149400 |
| C | -0.94746900 | -3.18290500 | -2.05970200 |
| C | -0.81198000 | -3.05386500 | -3.43979800 |
| C | -0.01412200 | -2.01801600 | -3.91872500 |
| C | 0.65694500  | -1.12795400 | -3.07339700 |
| C | 0.53014300  | -1.29849400 | -1.67669500 |
| C | -0.30805500 | -2.32457400 | -1.16650300 |
| P | 1.17832900  | -0.14509900 | -0.40036600 |
| C | 2.21624700  | -1.01371500 | 0.84963300  |
| C | 2.76170400  | -2.31103000 | 0.72937600  |
| C | 3.42650900  | -2.86135100 | 1.83216100  |
| C | 3.58785000  | -2.17800700 | 3.03243900  |
| C | 3.09361200  | -0.87590600 | 3.10801800  |
| C | 2.42101100  | -0.27650300 | 2.04539400  |
| C | 2.72956300  | -3.17860800 | -0.50974500 |
| C | 4.27410300  | -2.81154400 | 4.21320000  |
| C | 1.98328200  | 1.15617500  | 2.20274200  |
| C | 1.46209600  | -0.03356200 | -3.73375300 |
| C | -1.53009500 | -3.99326600 | -4.37177000 |
| C | -0.54286200 | -2.56725800 | 0.30547100  |
| C | 2.21764800  | 1.24018400  | -1.03736600 |
| C | 1.61434700  | 2.51515000  | -1.11244900 |
| C | 2.39261000  | 3.61852000  | -1.47283300 |
| C | 3.75117400  | 3.50574100  | -1.75272300 |
| C | 4.32637200  | 2.23682100  | -1.68299500 |
| C | 3.59449200  | 1.10212100  | -1.33291900 |
| C | 0.15365400  | 2.74138000  | -0.83002400 |
| C | 4.32657700  | -0.21457000 | -1.32182900 |
| C | 4.58331600  | 4.70693600  | -2.11434700 |
| H | 5.20485800  | 4.50703600  | -3.00003500 |
| H | -1.42448600 | 0.35922200  | -0.07472100 |
| H | 5.38746100  | 2.12061900  | -1.92015600 |
| H | -0.56617800 | -1.64279300 | 0.89499500  |
| H | -0.48786900 | 2.09364700  | -1.44133100 |
| H | 5.25828300  | -0.13577200 | -1.89887600 |
| H | -0.09901000 | 2.54252700  | 0.22288900  |
| H | 1.91246600  | 4.59820600  | -1.53434400 |
| H | 4.58591300  | -0.52464700 | -0.29878600 |
| H | -1.59709700 | -3.96226600 | -1.65338800 |
| H | -0.13307400 | 3.77824300  | -1.04795600 |
| H | 0.08751100  | -1.88327900 | -4.99874900 |
| H | 0.92310200  | 1.29571700  | 1.94708000  |
| H | 3.23571900  | -0.30003400 | 4.02610700  |
| H | 4.99070000  | -2.11762900 | 4.67716400  |
| H | 3.72819600  | -1.02166800 | -1.76392100 |
| H | 2.11034400  | 1.48594500  | 3.24069000  |
| H | 2.57460600  | 1.82285700  | 1.55610400  |
| H | -1.19928600 | -5.03187300 | -4.21575500 |
| H | -2.61611200 | -3.96676500 | -4.19266300 |
| H | -1.35221300 | -3.73402200 | -5.42456400 |
| H | 0.24391400  | -3.20018800 | 0.74283800  |
| H | 1.37814300  | -0.11782000 | -4.82563200 |
| H | 1.11426100  | 0.96902300  | -3.44835400 |
| H | 2.52883700  | -0.08633200 | -3.47790700 |
| H | -1.50961600 | -3.06575400 | 0.45347800  |
| H | 3.84322600  | -3.86770400 | 1.73405300  |
| H | 3.53890100  | -3.08730900 | 4.98606600  |

|   |             |             |             |
|---|-------------|-------------|-------------|
| H | 4.81522800  | -3.72349500 | 3.92527600  |
| H | 2.54471400  | -2.62786400 | -1.43535900 |
| H | 3.69055400  | -3.70348700 | -0.61008500 |
| H | -0.47937700 | 0.30452400  | 0.03452200  |
| H | 1.94347900  | -3.94670400 | -0.44041400 |
| H | 3.95626400  | 5.58412000  | -2.32473600 |
| H | 5.26445400  | 4.96958600  | -1.28924600 |
| H | -2.46856800 | 1.34165300  | -1.97562900 |
| H | -3.74904600 | 3.07423100  | -3.16600400 |
| H | -5.30700600 | 4.56869900  | -1.91551100 |
| H | -5.56451100 | 4.27703800  | 0.54751800  |
| H | -4.27282300 | 2.54954600  | 1.73823600  |
| H | -1.89168700 | 3.13171000  | 1.97312600  |
| H | -0.76998200 | 3.65394200  | 4.10178600  |
| H | 0.01402300  | 1.81777600  | 5.59539100  |
| H | -0.32558000 | -0.55430500 | 4.89713700  |
| H | -1.47130000 | -1.07275800 | -2.78781600 |
| H | -3.87595800 | -0.86147000 | 2.76121500  |
| H | -5.21265300 | -2.91971900 | 2.53959600  |
| H | -5.46851500 | -4.02227100 | 0.31884900  |
| H | -4.38698100 | -2.99762500 | -1.68641600 |
| H | -3.05168800 | -0.94505200 | -1.46007200 |

### Me<sub>3</sub>P<sup>+</sup>H<sub>2</sub><sup>-</sup>BF<sub>3</sub>

|   |             |             |             |
|---|-------------|-------------|-------------|
| P | 1.25411500  | -0.00954400 | -0.22735900 |
| B | -1.98696100 | -0.01087600 | -0.24004800 |
| C | 2.74681000  | -0.69436100 | -1.04226800 |
| H | 2.93909100  | -0.15204300 | -1.97914100 |
| H | -0.29331700 | -0.00751600 | -1.04389900 |
| F | -3.23171300 | 0.29266100  | -0.70960100 |
| H | -1.20856400 | 0.06231500  | -1.39592200 |
| C | 1.70905100  | 1.69361700  | 0.25829500  |
| H | 3.62867500  | -0.61218800 | -0.38893800 |
| H | 2.57466300  | -1.75340300 | -1.28269500 |
| H | 1.93187100  | 2.28787600  | -0.63951800 |
| H | 0.83884000  | 2.13281200  | 0.76535900  |
| H | 2.58131700  | 1.70292800  | 0.92869900  |
| C | 1.10671800  | -0.92289600 | 1.34657900  |
| H | 0.25929300  | -0.49572500 | 1.89897200  |
| H | 0.87634400  | -1.97546400 | 1.13269400  |
| H | 2.03089700  | -0.85023600 | 1.93853000  |
| F | -1.81565200 | -1.29941200 | 0.22555800  |
| F | -1.44280200 | 0.94008800  | 0.62858100  |

### carbH<sup>+</sup>HB(C<sub>6</sub>F<sub>5</sub>)<sub>3</sub>

|   |             |             |             |
|---|-------------|-------------|-------------|
| B | -0.69174600 | -0.13843000 | -0.11554400 |
| N | 3.51819500  | 0.60879800  | 0.98552900  |
| N | 2.21059000  | 2.11306200  | 1.86738200  |
| C | 3.99951500  | 1.84433800  | 0.60617700  |
| C | 3.17993800  | 2.78006900  | 1.15152200  |
| C | 2.42838600  | 0.80497600  | 1.73630200  |
| C | 4.19787800  | -0.71535500 | 0.79021700  |
| C | -1.28399900 | -1.50727200 | 0.54670200  |
| C | -1.88464000 | 0.90629100  | -0.50287000 |
| C | 0.38144900  | -0.38714500 | -1.32456800 |
| C | -2.39885200 | -2.17567600 | 0.04263200  |
| C | -0.74000000 | -2.07749200 | 1.68997500  |
| C | -1.23487000 | -3.22107400 | 2.30687000  |
| C | -2.34941000 | -3.84583800 | 1.76632600  |
| C | -2.93732900 | -3.31787000 | 0.62249200  |
| C | -2.27458100 | 1.25720700  | -1.79240300 |
| C | -2.58260300 | 1.55353100  | 0.51339200  |
| C | -3.57233100 | 2.50296400  | 0.29413900  |
| C | -3.91792800 | 2.82748600  | -1.01118900 |
| C | -3.26593500 | 2.19629400  | -2.06242700 |
| C | 0.53335500  | -1.54595400 | -2.08318400 |
| C | 1.32339500  | 0.60312200  | -1.59048100 |
| C | 2.37888700  | 0.45516000  | -2.47836400 |
| C | 2.50989500  | -0.73238500 | -3.18519500 |
| C | 1.56932000  | -1.73606800 | -2.99700100 |
| C | 5.17950900  | -0.59778300 | -0.37627000 |
| C | 4.94489800  | -1.03357300 | 2.09031800  |
| C | 3.14678200  | -1.78150600 | 0.48782800  |

|   |             |             |             |
|---|-------------|-------------|-------------|
| C | 1.07608200  | 2.76472500  | 2.60253800  |
| C | 0.34730800  | 1.70422900  | 3.42484000  |
| C | 0.14583600  | 3.39420100  | 1.56288000  |
| C | 1.67642500  | 3.82364000  | 3.53168900  |
| H | 3.19821500  | 3.85875700  | 1.05974700  |
| H | 4.85810700  | 1.96577500  | -0.04013300 |
| H | 6.02143800  | 0.07091500  | -0.14345800 |
| H | 5.60092100  | -1.59217500 | -0.57587900 |
| H | 4.68699100  | -0.24894800 | -1.29374200 |
| H | 4.24374300  | -1.14670500 | 2.93066400  |
| H | 5.49387000  | -1.97933800 | 1.97740800  |
| H | 5.66729200  | -0.24120200 | 2.33742300  |
| H | 3.65295300  | -2.74860700 | 0.36156500  |
| H | 2.41192500  | -1.89456400 | 1.29536200  |
| H | 1.01953300  | 1.23304700  | 4.15847700  |
| H | -0.46602900 | 2.19420400  | 3.97607900  |
| H | -0.11020200 | 0.93718400  | 2.78837200  |
| H | -0.74011000 | 3.80458400  | 2.06741300  |
| H | 0.64582900  | 4.21318400  | 1.02381200  |
| H | -0.18160600 | 2.64497600  | 0.83292300  |
| H | 2.19464600  | 4.62031900  | 2.97797400  |
| H | 0.86297900  | 4.29633900  | 4.09965400  |
| H | 2.38152800  | 3.37385400  | 4.24665400  |
| H | 2.60751700  | -1.54905200 | -0.43726400 |
| H | 1.80180500  | 0.02176800  | 2.14734700  |
| H | -0.04381500 | 0.41260100  | 0.76121700  |
| F | -2.29472100 | 1.28069000  | 1.80435900  |
| F | -4.18125500 | 3.10948000  | 1.31881600  |
| F | -4.86488800 | 3.73502400  | -1.25171500 |
| F | -3.59718700 | 2.49733300  | -3.32016100 |
| F | -1.69680500 | 0.68353600  | -2.85887400 |
| F | 0.35467500  | -1.52689600 | 2.29213900  |
| F | -0.65393900 | -3.71600500 | 3.40480900  |
| F | -2.84809700 | -4.94285800 | 2.33564300  |
| F | -4.00486900 | -3.91770200 | 0.09429200  |
| F | -2.99730300 | -1.72899900 | -1.06874200 |
| F | -0.32091600 | -2.56837900 | -1.95351900 |
| F | 1.67842100  | -2.87740400 | -3.67833700 |
| F | 3.54034900  | -0.90718400 | -4.01499400 |
| F | 3.30197600  | 1.42044700  | -2.62106000 |
| F | 1.26138500  | 1.78478300  | -0.94061200 |

lutH<sup>-</sup> HB(C<sub>6</sub>F<sub>5</sub>)<sub>3</sub>

|   |             |             |             |
|---|-------------|-------------|-------------|
| C | 4.70818900  | -1.28190200 | -2.11890500 |
| C | 3.62645500  | -1.60610600 | -2.93002100 |
| C | 2.48829800  | -0.81218700 | -2.90009300 |
| N | 2.50150700  | 0.27417200  | -2.09856800 |
| F | 1.70362800  | -1.95740400 | -0.36186300 |
| C | 1.78299300  | -1.11504500 | 0.69058700  |
| C | 0.77837000  | -0.17451600 | 0.90474100  |
| C | 0.95719200  | 0.61665300  | 2.03910200  |
| C | 2.07313300  | 0.52551700  | 2.86870200  |
| C | 3.07205900  | -0.39523700 | 2.57722300  |
| C | 2.92253200  | -1.22993400 | 1.47755800  |
| B | -0.42823300 | -0.03372500 | -0.19262700 |
| C | -1.51021100 | -1.24683600 | -0.09469200 |
| C | -1.88761800 | -1.87807400 | 1.08784500  |
| C | -2.79287500 | -2.93266700 | 1.13579400  |
| C | -3.36549700 | -3.39576100 | -0.04233100 |
| C | -3.02412400 | -2.79615100 | -1.24728100 |
| C | -2.11483400 | -1.74468100 | -1.24477300 |
| F | 0.04301300  | 1.53064400  | 2.38488100  |
| F | 2.19940800  | 1.31803200  | 3.93312000  |
| F | 3.88457600  | -2.10867700 | 1.16846900  |
| C | -1.11762100 | 1.44847100  | -0.22645400 |
| C | -0.59939800 | 2.46744100  | -1.01348500 |
| C | -1.13849200 | 3.74298300  | -1.12183300 |
| C | -2.28421300 | 4.04282200  | -0.39907600 |
| C | -2.84938500 | 3.06512300  | 0.41161300  |
| C | -2.26184200 | 1.80677000  | 0.48608700  |
| F | 0.53677700  | 2.26341300  | -1.75835200 |
| F | -2.84475700 | 0.92813100  | 1.30864200  |
| F | -3.94395400 | 3.34926900  | 1.11630900  |
| F | -0.57053000 | 4.66729000  | -1.90156800 |

|   |             |             |             |
|---|-------------|-------------|-------------|
| H | 3.64275400  | -2.48780200 | -3.56856100 |
| H | 5.59429700  | -1.91810600 | -2.11507100 |
| H | 1.62377200  | 0.80399600  | -2.00781900 |
| H | 0.10842500  | -0.16487500 | -1.28192300 |
| C | 4.66797200  | -0.14990700 | -1.30902500 |
| H | 5.50477700  | 0.11376700  | -0.66459300 |
| C | 3.53184800  | 0.64443100  | -1.30526400 |
| C | 3.36260700  | 1.87562600  | -0.47852800 |
| H | 2.55747400  | 1.72358900  | 0.25588000  |
| H | 4.29128200  | 2.10845900  | 0.05441300  |
| H | 3.07860600  | 2.73109100  | -1.10721400 |
| C | 1.24145500  | -1.09235800 | -3.66680600 |
| H | 1.41990400  | -1.86321200 | -4.42526400 |
| H | 0.45346800  | -1.43114300 | -2.97681400 |
| H | 0.86527700  | -0.18252900 | -4.15544100 |
| F | -2.83125500 | 5.25440100  | -0.47623900 |
| F | 4.15971800  | -0.48009400 | 3.34319800  |
| F | -3.56561900 | -3.23430700 | -2.38781200 |
| F | -3.12001600 | -3.50199700 | 2.29768300  |
| F | -4.23501400 | -4.40565500 | -0.01641900 |
| F | -1.38266500 | -1.47109400 | 2.26199500  |
| F | -1.82346200 | -1.20647000 | -2.44966400 |

Me<sub>3</sub>PH<sup>-</sup> HB(C<sub>6</sub>F<sub>5</sub>)<sub>3</sub>

|   |             |             |             |
|---|-------------|-------------|-------------|
| F | -5.81623926 | -6.84314413 | -0.18874399 |
| F | 9.88076715  | -5.75367440 | 1.28618537  |
| F | 6.91671278  | -6.19101734 | -2.89933125 |
| F | -2.02044262 | -4.53253462 | 2.16371182  |
| C | -4.74086593 | -4.81862011 | -1.26859208 |
| F | -7.53240718 | -5.08009003 | -4.74179344 |
| C | 7.74441104  | -4.43080363 | 1.10590361  |
| C | 6.22597639  | -4.65100389 | -1.02360610 |
| C | -2.76606614 | -3.56165376 | -0.07699125 |
| C | -5.64543998 | -3.91019847 | -3.55891748 |
| F | 8.47574838  | -2.58429369 | 5.09576365  |
| C | 7.02303841  | -2.81352306 | 3.04352296  |
| F | 2.64741719  | -3.51953017 | -3.30330556 |
| C | 4.00602636  | -3.25294469 | -1.17487867 |
| C | 4.78511897  | -1.45704728 | 2.81296692  |
| C | 3.19344421  | -1.62565423 | 0.72399562  |
| P | -5.67846651 | 0.07737689  | 4.22469250  |
| C | -1.63042377 | -1.37275948 | -1.00285123 |
| C | -4.54342339 | -1.76188795 | -4.59468393 |
| H | -3.05073620 | -0.20918699 | 3.72647943  |
| H | -0.15419231 | 0.00906110  | 2.86890092  |
| F | 4.18445071  | 0.08937801  | 4.73862053  |
| C | -2.58711836 | -0.54755382 | -3.31545272 |
| B | 0.58873840  | 0.00498870  | 0.66137388  |
| F | -5.37824199 | -0.88137568 | -6.80058392 |
| F | -1.63933556 | 1.50246450  | -4.44981564 |
| C | 1.02322817  | 2.97349332  | -0.07256741 |
| F | -2.34079986 | 4.28274490  | 2.63634934  |
| F | 4.33271684  | 2.19167187  | -2.98523064 |
| C | -0.43289831 | 4.87563125  | 0.99473858  |
| C | 2.85451268  | 3.83635162  | -1.75947112 |
| C | -0.14854352 | 7.43699250  | 0.50202083  |
| C | 3.23382243  | 6.37851513  | -2.31107651 |
| F | -1.64696019 | 9.14542405  | 1.60873894  |
| F | 5.01655608  | 7.09044101  | -3.94103522 |
| C | 1.72202272  | 8.19830069  | -1.16974618 |
| F | 2.05076150  | 10.63922779 | -1.68720611 |
| C | -7.01386810 | -2.93422288 | 5.14491731  |
| H | -6.73126341 | -4.31906145 | 3.62558317  |
| H | -6.03916818 | -3.60809360 | 6.84936525  |
| H | -9.04082424 | -2.71218373 | 5.53676337  |
| C | -7.26130483 | 1.26591834  | 1.44299295  |
| H | -7.10444441 | -0.13760961 | -0.07785486 |
| H | -9.26026090 | 1.62694118  | 1.87463853  |
| H | -6.31290032 | 3.01881313  | 0.86954800  |
| C | -6.03713263 | 2.31482966  | 6.78635233  |
| H | -5.08589367 | 1.57543835  | 8.47681440  |
| H | -5.13956742 | 4.09765772  | 6.22035479  |
| H | -8.05087769 | 2.61844262  | 7.18977673  |

| tBu <sub>3</sub> PH <sup>-</sup> HB(C <sub>6</sub> F <sub>5</sub> ) <sub>3</sub> |             |             |             | Mes <sub>3</sub> PH <sup>-</sup> HBPh <sub>3</sub> |             |             |             |
|----------------------------------------------------------------------------------|-------------|-------------|-------------|----------------------------------------------------|-------------|-------------|-------------|
| H                                                                                | 3.36521200  | -4.11055900 | -0.62332200 | C                                                  | -3.87155200 | -1.89517600 | -0.14453700 |
| H                                                                                | 4.42240900  | -3.45246500 | -2.69820700 | C                                                  | -3.24563400 | -1.38637100 | 1.01122600  |
| H                                                                                | 1.82863100  | -3.74277100 | -2.23214900 | C                                                  | -3.20907700 | -2.25563600 | 2.11443300  |
| F                                                                                | 1.24979400  | -3.45543100 | 2.68895300  | C                                                  | -3.71367800 | -3.55775900 | 2.05978900  |
| C                                                                                | 3.30543000  | -3.06633600 | -0.27956700 | C                                                  | -4.29020000 | -4.04164800 | 0.88719500  |
| H                                                                                | 4.22620500  | -2.86071100 | 0.27935800  | C                                                  | -4.37700000 | -3.19216100 | -0.21774200 |
| H                                                                                | 2.44483600  | -3.00069600 | 0.39658900  | B                                                  | -2.53461400 | 0.08657700  | 0.95328000  |
| F                                                                                | -5.46742100 | -3.01193700 | -2.05137300 | C                                                  | -2.06787100 | 0.69249600  | 2.39434500  |
| C                                                                                | 4.34631000  | -2.38052200 | -2.45742000 | C                                                  | -2.50714700 | 1.91750400  | 2.92374000  |
| H                                                                                | 5.29500500  | -2.07948300 | -1.99196700 | C                                                  | -1.97752300 | 2.46053700  | 4.09709300  |
| F                                                                                | -5.65469000 | -1.85893300 | 0.40876700  | C                                                  | -0.97954000 | 1.78880400  | 4.80051100  |
| C                                                                                | 1.84374300  | -2.64238900 | -2.24126200 | C                                                  | -0.52577200 | 0.56205300  | 4.31382900  |
| H                                                                                | 5.57129200  | -1.43591200 | 0.15374600  | C                                                  | -1.06322900 | 0.03864700  | 3.13761700  |
| C                                                                                | 3.13720900  | -2.18487000 | -1.53064000 | C                                                  | -3.41204400 | 1.09781000  | 0.03154100  |
| F                                                                                | 0.22052500  | -2.46860300 | 0.43898100  | C                                                  | -4.69880400 | 1.53030700  | 0.40346800  |
| H                                                                                | 4.23714500  | -1.84334500 | -3.40901600 | C                                                  | -5.47300900 | 2.35661400  | -0.41013700 |
| C                                                                                | 0.57531700  | -2.29702100 | 2.72890300  | C                                                  | -4.98738200 | 2.77656500  | -1.65001700 |
| H                                                                                | 0.93397600  | -2.29703300 | -1.73507400 | C                                                  | -3.72482100 | 2.35186800  | -2.05926800 |
| F                                                                                | 0.94507400  | -2.10929600 | 5.05425700  | C                                                  | -2.96128800 | 1.52989300  | -1.22667900 |
| C                                                                                | -4.45479400 | -2.28790600 | -1.57379200 | C                                                  | -1.44366600 | -1.82689500 | -2.47300800 |
| C                                                                                | -4.54656400 | -1.69875800 | -0.31742700 | C                                                  | -1.59440800 | -1.03029400 | -3.60679800 |
| H                                                                                | 3.39319700  | -1.48287700 | 1.71304100  | C                                                  | -0.68338900 | 0.00407400  | -3.81321300 |
| H                                                                                | 1.79977600  | -2.32666300 | -3.28809000 | C                                                  | 0.32475000  | 0.30768700  | -2.89703800 |
| C                                                                                | 0.04410000  | -1.74614300 | 1.57055500  | C                                                  | 0.41361500  | -0.48120200 | -1.73056700 |
| H                                                                                | 6.12695900  | 0.01979400  | 0.99128000  | C                                                  | -0.46115600 | -1.57799400 | -1.51866700 |
| C                                                                                | 0.43752700  | -1.61061600 | 3.92714000  | P                                                  | 1.48797900  | -0.07677900 | -0.33060400 |
| F                                                                                | -3.20536900 | -2.67972100 | -3.53603700 | C                                                  | 2.66435500  | -1.38486100 | 0.13389700  |
| C                                                                                | 5.49824500  | -0.34167900 | 0.16288100  | C                                                  | 3.13784500  | -2.36389600 | -0.76849200 |
| C                                                                                | -3.30206800 | -2.11577900 | -2.32752200 | C                                                  | 4.03544700  | -3.31704800 | -0.28712500 |
| F                                                                                | -3.61469000 | -0.38847500 | 1.36930500  | C                                                  | 4.47653000  | -3.33208800 | 1.03697700  |
| C                                                                                | -3.47774000 | -0.95016100 | 0.15846100  | C                                                  | 4.00647500  | -2.34252000 | 1.89767900  |
| H                                                                                | 5.93250200  | 0.04481900  | -0.77145300 | C                                                  | 3.10663600  | -1.36206500 | 1.47657400  |
| C                                                                                | 3.45799300  | -0.38944800 | 1.68774300  | C                                                  | 2.74842700  | -2.45145700 | -2.22515500 |
| H                                                                                | 4.09937100  | -0.07693700 | 2.52660300  | C                                                  | 5.42357300  | -4.39810100 | 1.51759300  |
| H                                                                                | 2.61323200  | -0.63753400 | -4.13769200 | C                                                  | 2.66092400  | -0.31693600 | 2.46863000  |
| C                                                                                | -2.25930000 | -1.35591200 | -1.80782800 | C                                                  | 1.23485500  | 1.46655300  | -3.22514400 |
| C                                                                                | -2.30141700 | -0.75036800 | -0.55798500 | C                                                  | -2.74493800 | -1.25246100 | -4.54726600 |
| P                                                                                | 2.92824800  | -0.36916000 | -1.02993000 | C                                                  | -0.37521100 | -2.50996100 | -0.33611500 |
| C                                                                                | 4.06664800  | 0.17041700  | 0.38546800  | C                                                  | 2.29856700  | 1.55628800  | -0.33504900 |
| C                                                                                | -0.60291500 | -0.51695000 | 1.50860900  | C                                                  | 1.53821600  | 2.64715000  | 0.15207700  |
| H                                                                                | 2.45296700  | 0.02203600  | 1.86207000  | C                                                  | 2.14141700  | 3.90464600  | 0.19781300  |
| C                                                                                | -0.23934000 | -0.39713800 | 3.93201100  | C                                                  | 3.45735900  | 4.11465700  | -0.20966800 |
| H                                                                                | 4.88001300  | 0.26128400  | -3.27624200 | C                                                  | 4.17892500  | 3.02177100  | -0.68926600 |
| H                                                                                | 1.61133600  | -0.29076500 | -0.51101800 | C                                                  | 3.63176300  | 1.74055700  | -0.76485200 |
| H                                                                                | -0.09798200 | -0.15258600 | -0.70341400 | C                                                  | 0.12381900  | 2.51265800  | 0.64128000  |
| F                                                                                | -1.16772400 | -1.23330200 | -2.59857900 | C                                                  | 4.50779700  | 0.64542400  | -1.32023900 |
| C                                                                                | -0.74492600 | 0.11831700  | 2.74099900  | C                                                  | 4.07812300  | 5.48222500  | -0.11750000 |
| B                                                                                | -1.04362800 | 0.07881000  | 0.04663200  | H                                                  | 3.39520800  | 6.25293700  | -0.50356800 |
| F                                                                                | -0.39094300 | 0.26620100  | 5.07928700  | H                                                  | -1.46324900 | -0.09229600 | 0.34368200  |
| C                                                                                | 2.09222900  | 0.19885600  | -3.65543700 | H                                                  | 5.20691500  | 3.17034000  | -1.02828900 |
| H                                                                                | 1.09161000  | -0.12848600 | -3.33904500 | H                                                  | -0.28492000 | -1.97127400 | 0.61698900  |
| C                                                                                | 4.31470000  | 1.15449400  | -2.97516600 | H                                                  | -0.52062900 | 1.92105600  | -0.02376000 |
| C                                                                                | 2.89467200  | 0.81698100  | -2.49801500 | H                                                  | 5.38651200  | 1.08235500  | -1.81237700 |
| H                                                                                | 1.95807400  | 0.98160800  | -4.41827600 | H                                                  | 0.08802300  | 2.02405100  | 1.62851100  |
| H                                                                                | 4.89930800  | 1.69371200  | -2.21869300 | H                                                  | 1.55260400  | 4.74750300  | 0.56698700  |
| C                                                                                | 4.12418700  | 1.70143700  | 0.53584900  | H                                                  | 4.86436200  | -0.03296100 | -0.53146500 |
| H                                                                                | 4.23841400  | 1.80970800  | -3.85701200 | H                                                  | -2.13924100 | -2.64823000 | -2.29313100 |
| F                                                                                | -1.37767700 | 1.29461300  | 2.83231900  | H                                                  | -0.34387700 | 3.49798500  | 0.75670200  |
| H                                                                                | 4.75234200  | 1.91505900  | 1.41483700  | H                                                  | -0.77261500 | 0.61951800  | -4.71145700 |
| H                                                                                | 4.59201900  | 2.19984600  | -0.32241200 | H                                                  | 1.57638900  | -0.35242000 | 2.65180100  |
| H                                                                                | 3.14019800  | 2.14450700  | 0.72189900  | H                                                  | 4.35162400  | -2.32521200 | 2.93408800  |
| C                                                                                | -1.17732300 | 1.70562500  | 0.02431400  | H                                                  | 6.19501200  | -4.61498700 | 0.76466800  |
| F                                                                                | 1.02969300  | 1.81727600  | 0.87956600  | H                                                  | 3.98712200  | 0.03055700  | -2.06708700 |
| F                                                                                | -3.37807400 | 1.87891100  | -0.85836900 | H                                                  | 3.15958900  | -0.46752500 | 3.43430200  |
| H                                                                                | 1.08473700  | 1.85159000  | -1.83515500 | H                                                  | 2.89671300  | 0.70221100  | 2.12625400  |
| C                                                                                | 2.13158700  | 2.08655800  | -2.07516600 | H                                                  | -2.55733800 | -0.80855300 | -5.53472400 |
| H                                                                                | 2.57324500  | 2.61771500  | -1.22682600 | H                                                  | -2.95968600 | -2.32270000 | -4.67627300 |
| C                                                                                | -0.07550200 | 2.45917500  | 0.41260000  | H                                                  | -3.64916500 | -0.77932800 | -4.13073400 |
| C                                                                                | -2.24640700 | 2.46395200  | -0.44462400 | H                                                  | 0.47971400  | -3.19886700 | -0.42537000 |
| H                                                                                | 2.12918900  | 2.77723300  | -2.93286100 |                                                    |             |             |             |
| C                                                                                | 0.01509800  | 3.83824700  | 0.33615600  |                                                    |             |             |             |
| C                                                                                | -2.21485600 | 3.85631200  | -0.52922600 |                                                    |             |             |             |
| F                                                                                | 1.14320900  | 4.47040300  | 0.68688100  |                                                    |             |             |             |

|   |             |             |             |
|---|-------------|-------------|-------------|
| H | 1.07905100  | 1.77333800  | -4.26756500 |
| H | 1.03520300  | 2.33976000  | -2.58706700 |
| H | 2.29799200  | 1.21517200  | -3.10940500 |
| H | -1.29642300 | -3.10110100 | -0.25914800 |
| H | 4.41051400  | -4.07459500 | -0.97990100 |
| H | 5.92229000  | -4.10467500 | 2.45123900  |
| H | 4.87881200  | -5.33624300 | 1.70947700  |
| H | 2.70079900  | -1.47439700 | -2.72251200 |
| H | 3.47466000  | -3.07083300 | -2.76790900 |
| H | 0.57062400  | -0.01060100 | 0.74057900  |
| H | 1.75589100  | -2.90904100 | -2.35108500 |
| H | 4.29458700  | 5.73352800  | 0.93295900  |
| H | 5.02042800  | 5.53968000  | -0.67906900 |
| H | -3.96248700 | -1.24303900 | -1.01834300 |
| H | -4.85284300 | -3.54180700 | -1.13875700 |
| H | -4.68707000 | -5.05842100 | 0.83966000  |
| H | -3.66088600 | -4.19755900 | 2.94509100  |
| H | -2.77551000 | -1.90686400 | 3.05530300  |
| H | -5.11309400 | 1.19175500  | 1.35853000  |
| H | -6.46730600 | 2.66982700  | -0.08071200 |
| H | -5.59276700 | 3.42063200  | -2.29222400 |
| H | -3.33161100 | 2.65926400  | -3.03288100 |
| H | -1.98322900 | 1.18715900  | -1.57799800 |
| H | -0.68540900 | -0.92482700 | 2.77283600  |
| H | 0.24989500  | 0.01232400  | 4.85536300  |
| H | -0.56316100 | 2.21145400  | 5.71760700  |
| H | -2.34765700 | 3.42172200  | 4.46426600  |
| H | -3.27343900 | 2.48147900  | 2.38598700  |

Me<sub>3</sub>PH<sup>-</sup>·HBF<sub>3</sub>

|   |             |             |             |
|---|-------------|-------------|-------------|
| P | 1.24687500  | -0.01304600 | -0.14549400 |
| B | -1.95974300 | 0.01871800  | -0.46622800 |
| C | 2.75307100  | -0.78586600 | -0.80637600 |
| H | 3.00652800  | -0.33609300 | -1.77626500 |
| H | 0.22432000  | -0.21173200 | -1.09211600 |
| F | -3.32081900 | 0.16891800  | -0.28481600 |
| H | -1.57451500 | 0.26549200  | -1.62724500 |
| C | 1.54567400  | 1.75836700  | 0.04430000  |
| H | 3.58980900  | -0.64352600 | -0.10828200 |
| H | 2.57503100  | -1.86138700 | -0.94555400 |
| H | 1.84616800  | 2.18410100  | -0.92264100 |
| H | 0.59213000  | 2.19520800  | 0.36802500  |
| H | 2.33538300  | 1.92810700  | 0.78901100  |
| C | 0.86173900  | -0.78920400 | 1.43485000  |
| H | 0.01080500  | -0.24204600 | 1.85662200  |
| H | 0.54555800  | -1.82175800 | 1.24279300  |
| H | 1.74836500  | -0.75159500 | 2.08291800  |
| F | -1.52307000 | -1.29547600 | -0.08646400 |
| F | -1.24132100 | 0.93739600  | 0.43901600  |

HB(C<sub>6</sub>F<sub>5</sub>)<sub>3</sub>

|   |             |             |             |
|---|-------------|-------------|-------------|
| B | 0.05670300  | -0.06082700 | 0.86910300  |
| C | -1.20000700 | -0.98470000 | 0.37009700  |
| C | -0.20941100 | 1.47770200  | 0.35867200  |
| C | 1.53585900  | -0.63896400 | 0.47021800  |
| C | -1.62973100 | -1.01547400 | -0.95439800 |
| C | -1.95562800 | -1.75302100 | 1.25061400  |
| C | -3.06600600 | -2.49642800 | 0.85577900  |
| C | -3.45739900 | -2.48775300 | -0.47465400 |
| C | -2.73017700 | -1.74097600 | -1.39272900 |
| C | 0.44482800  | 2.13463900  | -0.67967300 |
| C | -1.19820200 | 2.22968000  | 0.99251700  |
| C | -1.51465800 | 3.53865200  | 0.64585200  |
| C | -0.82401800 | 4.15351300  | -0.38941000 |
| C | 0.16318400  | 3.44455700  | -1.05806000 |
| C | 1.81802100  | -1.81415000 | -0.21958500 |
| C | 2.66447900  | 0.04965400  | 0.91871800  |
| C | 3.96976000  | -0.37135800 | 0.70416100  |
| C | 4.19697900  | -1.55079000 | 0.00633100  |
| C | 3.11167200  | -2.27631800 | -0.45759800 |
| H | 0.03610600  | -0.02709800 | 2.08761900  |
| F | -1.91336700 | 1.69325700  | 1.99491000  |
| F | -2.47509000 | 4.21421400  | 1.29464700  |

|   |             |             |             |
|---|-------------|-------------|-------------|
| F | -1.11096400 | 5.41417500  | -0.74173200 |
| F | 0.82905200  | 4.02833100  | -2.06534100 |
| F | 1.40159200  | 1.51514500  | -1.39094300 |
| F | -1.63852700 | -1.82178400 | 2.55252800  |
| F | -3.76273600 | -3.22058800 | 1.74479700  |
| F | -4.52276100 | -3.19638500 | -0.87226800 |
| F | -3.09697100 | -1.73686300 | -2.68263600 |
| F | -0.95137400 | -0.33257500 | -1.89239700 |
| F | 0.83406600  | -2.59269900 | -0.70579500 |
| F | 3.31746800  | -3.41767500 | -1.13142500 |
| F | 5.44756600  | -1.97968900 | -0.21262700 |
| F | 5.01128900  | 0.33941600  | 1.16108200  |
| F | 2.51554600  | 1.19821400  | 1.60117400  |

HBPh<sub>3</sub>

|   |             |             |             |
|---|-------------|-------------|-------------|
| C | -1.14324100 | -2.37877900 | 1.03932400  |
| C | -1.07476300 | -1.12629000 | 0.39972300  |
| C | -1.94218700 | -0.95034000 | -0.69199700 |
| C | -2.81851000 | -1.95069000 | -1.12205000 |
| C | -2.85891600 | -3.17933600 | -0.46517700 |
| C | -2.01032100 | -3.38833600 | 0.62453300  |
| B | 0.00037400  | -0.00018500 | 0.90030500  |
| C | -0.43773700 | 1.49399900  | 0.39995500  |
| C | 0.15297400  | 2.16176800  | -0.68645600 |
| C | -0.27610700 | 3.42091500  | -1.11560600 |
| C | -1.32558000 | 4.06561400  | -0.46324500 |
| C | -1.93558500 | 3.43059600  | 0.62117800  |
| C | -1.49382000 | 2.17505100  | 1.03517700  |
| C | 1.51320700  | -0.36810100 | 0.39975800  |
| C | 1.79520000  | -1.20753100 | -0.69159400 |
| C | 3.09993800  | -1.46584300 | -1.12117300 |
| C | 4.18379200  | -0.88582700 | -0.46424200 |
| C | 3.93982800  | -0.04622400 | 0.62514500  |
| C | 2.63175500  | 0.19941000  | 1.03950100  |
| H | 0.00039300  | -0.00011800 | 2.14342400  |
| H | -0.48504200 | -2.55892800 | 1.89553500  |
| H | -2.02887600 | -4.34601200 | -1.15431900 |
| H | -3.54410900 | -3.96522600 | -0.79531300 |
| H | -3.47666200 | -1.76755700 | -1.97722400 |
| H | -1.93292300 | 0.00774100  | -1.22106200 |
| H | 0.96122600  | -1.67899200 | -1.22085700 |
| H | 3.27091300  | -2.12760200 | -1.97608700 |
| H | 5.20713900  | -1.08596000 | -0.79411200 |
| H | 4.77809700  | 0.41714000  | 1.15501300  |
| H | 2.45819700  | 0.85975300  | 1.89542100  |
| H | -1.98284300 | 1.69148600  | 1.88712300  |
| H | -2.76023200 | 3.92176100  | 1.14736300  |
| H | -1.66435100 | 5.05187900  | -0.79282300 |
| H | 0.21530300  | 3.90288600  | -1.96663800 |
| H | 0.98234000  | 1.67833600  | -1.21213600 |

HBF<sub>3</sub>

|   |             |             |             |
|---|-------------|-------------|-------------|
| B | 0.00046200  | -0.00015300 | 0.37045700  |
| F | 0.04574500  | -1.33858500 | -0.12880900 |
| H | 0.00005100  | 0.00016600  | 1.62536000  |
| F | -1.18296800 | 0.62965700  | -0.12873900 |
| F | 1.13696000  | 0.70899400  | -0.12885700 |

Hcarb

|   |             |             |             |
|---|-------------|-------------|-------------|
| N | -1.09089100 | -0.24510300 | -0.00007200 |
| N | 1.09085500  | -0.24509900 | -0.00007400 |
| C | -0.67985000 | -1.56117400 | -0.00005100 |
| C | 0.67979500  | -1.56117400 | -0.00005500 |
| C | -0.00001300 | 0.52448300  | -0.00009100 |
| C | -2.52414000 | 0.20967700  | 0.00001600  |
| C | -3.18344300 | -0.34236500 | -1.26672200 |
| C | -3.18311300 | -0.34173000 | 1.26722200  |
| C | -2.56494500 | 1.73645800  | -0.00038100 |
| C | 2.52415100  | 0.20964500  | 0.00001800  |
| C | 2.56502600  | 1.73643100  | 0.00013500  |
| C | 3.18330900  | -0.34196300 | -1.26699000 |
| C | 3.18323300  | -0.34216300 | 1.26697000  |

|                                  |             |             |             |                                  |             |             |             |
|----------------------------------|-------------|-------------|-------------|----------------------------------|-------------|-------------|-------------|
| H                                | 1.37755600  | -2.39058100 | -0.00000100 | H                                | 2.93605600  | -0.90238700 | -0.78907200 |
| H                                | -1.37757700 | -2.39061100 | 0.00004100  | H                                | -0.68696200 | 2.98489000  | -0.80431500 |
| H                                | -3.17859900 | -1.44160200 | -1.28742200 | H                                | 1.93451900  | -2.46082600 | 1.69850100  |
| H                                | -4.23215000 | -0.01593700 | -1.30048100 | C                                | 1.41825000  | -1.51672400 | 1.46729100  |
| H                                | -2.67812900 | 0.02864900  | -2.17016000 | H                                | 0.57383000  | -1.42549900 | 2.16437400  |
| H                                | -2.67773700 | 0.02998500  | 2.17033600  | C                                | 2.18150900  | -1.67868200 | -0.94508400 |
| H                                | -4.23189100 | -0.01552500 | 1.30094600  | H                                | 2.66709300  | -2.64637400 | -0.74818400 |
| H                                | -3.17797300 | -1.44095400 | 1.28863000  | H                                | -2.12124000 | 2.09116500  | 0.45983200  |
| H                                | -3.61615100 | 2.05382700  | -0.00045500 | P                                | 0.00027900  | 0.00030300  | -0.45199600 |
| H                                | -2.09627100 | 2.16348100  | 0.89893600  | C                                | 0.96756400  | -1.56417600 | -0.00129800 |
| H                                | 2.09635400  | 2.16314500  | 0.89960000  | H                                | 1.88227300  | -1.67468200 | -2.00403700 |
| H                                | 3.61624900  | 2.05375000  | 0.00018700  | H                                | -1.52241600 | 0.20923900  | 2.16575000  |
| H                                | 2.09642200  | 2.16328700  | -0.89929700 | H                                | -0.00031400 | 0.00019600  | -1.86679400 |
| H                                | 4.23205100  | -0.01564200 | -1.30069700 | C                                | -2.49008400 | 1.31947700  | -0.22604000 |
| H                                | 3.17831800  | -1.44119000 | -1.28812700 | H                                | -2.37984400 | 1.67010600  | -1.26226400 |
| H                                | 2.67797100  | 0.02949000  | -2.17023300 | C                                | -2.02230600 | -0.47525300 | 1.46652000  |
| H                                | 3.17840300  | -1.44139600 | 1.28786300  | C                                | -1.83892700 | -0.05569500 | -0.00027100 |
| H                                | 4.23193300  | -0.01571700 | 1.30085000  | H                                | -3.56805800 | 1.20761400  | -0.03556900 |
| H                                | 2.67776000  | 0.02901400  | 2.17025100  | H                                | -1.66924800 | -1.49570700 | 1.66356800  |
| H                                | -2.09630200 | 2.16301000  | -0.89994400 | C                                | 0.10363900  | -2.81598400 | -0.23194300 |
| H                                | -0.00004100 | 1.60618000  | -0.00024200 | H                                | -3.09789100 | -0.45413300 | 1.69841900  |
| =====                            |             |             |             | H                                | 0.74099900  | -3.69346000 | -0.04577200 |
| <sup>1</sup> Hlut                |             |             |             | H                                | -0.74812600 | -2.88616800 | 0.45513600  |
| =====                            |             |             |             | H                                | -0.25685600 | -2.89184200 | -1.26797800 |
| C                                | -0.00010500 | 1.85123100  | 0.00245100  | H                                | -2.39453800 | -0.78143100 | -2.00609900 |
| C                                | 1.21049300  | 1.16032100  | -0.00065600 | C                                | -2.54573000 | -1.04492000 | -0.94830100 |
| C                                | 1.20652000  | -0.22585500 | -0.00534900 | H                                | -2.24972300 | -2.08711500 | -0.79911900 |
| N                                | 0.00007100  | -0.84606400 | -0.00730900 | H                                | -3.62636500 | -0.98381800 | -0.74945000 |
| H                                | 2.16159500  | 1.69080100  | -0.00149300 | =====                            |             |             |             |
| H                                | -0.00016800 | 2.94238400  | 0.00498300  | <sup>1</sup> HMes <sub>3</sub> P |             |             |             |
| H                                | 0.00013200  | -1.86489900 | -0.01359200 | =====                            |             |             |             |
| C                                | -1.21055700 | 1.16019300  | -0.00046700 | C                                | -2.37819400 | -3.27158100 | 0.73687300  |
| H                                | -2.16175300 | 1.69051300  | -0.00114000 | C                                | -3.33192100 | -3.08239700 | -0.26325600 |
| C                                | -1.20638900 | -0.22604200 | -0.00517400 | C                                | -3.24996000 | -1.92564000 | -1.04250800 |
| C                                | -2.42936300 | -1.08455500 | 0.00421000  | C                                | -2.26386100 | -0.95933300 | -0.85090700 |
| H                                | -2.52953400 | -1.59688900 | 0.97381900  | C                                | -1.32199400 | -1.17479300 | 0.18088800  |
| H                                | -3.32648600 | -0.47569700 | -0.15436200 | C                                | -1.37034900 | -2.34015600 | 0.98227400  |
| H                                | -2.38314500 | -1.84783700 | -0.78665300 | P                                | -0.00132800 | -0.00044800 | 0.58162000  |
| C                                | 2.42938100  | -1.08452000 | 0.00435900  | C                                | 1.67666700  | -0.55940200 | 0.18671600  |
| H                                | 3.32683400  | -0.47556900 | -0.15177900 | C                                | 1.96040400  | -1.46435800 | -0.86072200 |
| H                                | 2.52794500  | -1.59872100 | 0.97318600  | C                                | 3.29023800  | -1.83307300 | -1.05938200 |
| H                                | 2.38419900  | -1.84627800 | -0.78804800 | C                                | 4.33280500  | -1.34222000 | -0.27049100 |
| =====                            |             |             |             | C                                | 4.01997200  | -0.44162300 | 0.74878600  |
| <sup>1</sup> HMes <sub>3</sub> P |             |             |             | C                                | 2.71042600  | -0.03574300 | 0.99945400  |
| =====                            |             |             |             | C                                | 0.91997300  | -2.04399400 | -1.78692300 |
| P                                | 0.00030800  | 0.00023900  | -0.33687700 | C                                | 5.74962900  | -1.78646000 | -0.50486100 |
| C                                | -0.46943800 | -1.65356600 | 0.21413600  | C                                | 2.45898500  | 0.94635900  | 2.11812200  |
| H                                | 0.25379800  | -2.38743200 | -0.16780700 | C                                | -2.26153700 | 0.24080200  | -1.76596300 |
| H                                | 0.00045300  | 0.00058900  | -1.74706100 | C                                | -4.42976000 | -4.08318000 | -0.49268100 |
| C                                | 1.66736100  | 0.42040500  | 0.21437200  | C                                | -0.37998400 | -2.62018200 | 2.08682700  |
| H                                | -0.47464900 | -1.67867700 | 1.31322800  | C                                | -0.35400500 | 1.73184000  | 0.18549200  |
| H                                | -1.47235700 | -1.89504200 | -0.16459100 | C                                | -1.33482600 | 2.36236600  | 0.98969600  |
| H                                | 2.37845500  | -0.32476300 | -0.16848600 | C                                | -1.63485300 | 3.69973700  | 0.74057600  |
| H                                | 1.93891100  | 1.41605700  | -0.16326000 | C                                | -0.99743400 | 4.42575500  | -0.26744200 |
| H                                | 1.69277000  | 0.42368700  | 1.31346800  | C                                | -0.04169000 | 3.77168700  | -1.04693800 |
| C                                | -1.19819600 | 1.23288400  | 0.21421000  | C                                | 0.30034900  | 2.43360200  | -0.85060600 |
| H                                | -0.90791300 | 2.22310100  | -0.16382500 | C                                | -2.07087800 | 1.64735700  | 2.09711700  |
| H                                | -2.19460600 | 0.97117700  | -0.16815000 | C                                | 1.33080200  | 1.82663200  | -1.77062700 |
| H                                | -1.21783600 | 1.24938600  | 1.31334000  | C                                | -1.32033400 | 5.87598000  | -0.49468400 |
| =====                            |             |             |             | H                                | -2.37423200 | 6.09140300  | -0.27115300 |
| <sup>1</sup> HtBu <sub>3</sub> P |             |             |             | H                                | 0.45268900  | 4.32191900  | -1.85052700 |
| =====                            |             |             |             | H                                | -0.52975800 | -1.94229200 | 2.94368600  |
| H                                | 2.82786800  | 2.48927200  | -0.03666500 | H                                | -2.50729100 | 0.69319600  | 1.76465100  |
| H                                | 1.16097700  | 2.90375100  | 1.70220900  | H                                | 1.54458900  | 2.51468300  | -2.59801400 |
| H                                | 0.95291400  | 3.63512100  | -0.74394100 | H                                | -1.40762300 | 1.43540200  | 2.95234100  |
| C                                | 2.38817700  | 1.49851600  | -0.22610500 | H                                | -2.39596600 | 4.19002900  | 1.35204100  |
| H                                | 2.87373900  | 0.79552800  | 0.46126800  | H                                | 2.27745300  | 1.62273200  | -1.24977300 |
| H                                | 2.63778100  | 1.22639000  | -1.26180100 | H                                | -2.41649000 | -4.17694800 | 1.34683900  |
| C                                | 0.60021600  | 1.98638400  | 1.46714000  | H                                | -2.89098800 | 2.27009000  | 2.47491300  |
| H                                | 0.93844400  | 1.20776500  | 2.16523600  | H                                | -3.98085300 | -1.77202900 | -1.83976600 |
| C                                | 0.36609000  | 2.72680600  | -0.94805000 | H                                | 1.94020100  | 0.46877400  | 2.96599600  |
| H                                | 2.12672700  | -0.70300400 | 1.66901500  | H                                | 4.82263300  | -0.03553800 | 1.36834700  |
| C                                | 0.87115500  | 1.61993100  | -0.00072400 | H                                | 5.94389900  | -1.95653100 | -1.57278900 |
| H                                | -0.45912900 | 2.19554900  | 1.66446000  | H                                | 0.99308900  | 0.87768700  | -2.21162300 |
| H                                | 0.52598800  | 2.46724800  | -2.00558600 | H                                | 3.40847200  | 1.33709400  | 2.50441900  |

|   |             |             |             |
|---|-------------|-------------|-------------|
| H | 1.85540400  | 1.80806700  | 1.79468100  |
| H | -4.60617600 | -4.24184000 | -1.56584700 |
| H | -4.19921000 | -5.05153300 | -0.02968100 |
| H | -5.37236200 | -3.71740300 | -0.05531400 |
| H | 0.66372700  | -2.51606000 | 1.75367300  |
| H | -2.95614000 | 0.07698200  | -2.59946400 |
| H | -2.57481500 | 1.15632400  | -1.24341900 |
| H | -1.27050000 | 0.43869700  | -2.19917500 |
| H | -0.50519300 | -3.64286000 | 2.46296900  |
| H | 3.52239500  | -2.52686200 | -1.87064000 |
| H | 6.47145000  | -1.04777600 | -0.13150400 |
| H | 5.94063400  | -2.73576700 | 0.02050100  |
| H | 0.24418200  | -1.27844100 | -2.19384200 |
| H | 1.40796200  | -2.53622200 | -2.63758000 |
| H | -0.00579800 | -0.00042000 | 1.98727400  |
| H | 0.29221200  | -2.79158700 | -1.28014900 |
| H | -0.70554000 | 6.50885100  | 0.16521100  |
| H | -1.11414600 | 6.17700100  | -1.53055200 |

---



---

H<sub>3</sub>P-BF<sub>3</sub>

|   |             |             |             |
|---|-------------|-------------|-------------|
| P | -1.95427000 | -0.00085600 | 0.00169800  |
| B | 1.12698700  | 0.00034100  | -0.00055100 |
| F | 1.17746500  | 1.12606200  | 0.69799100  |
| F | 1.18129200  | -1.16755900 | 0.62475100  |
| F | 1.17309600  | 0.04271800  | -1.32481400 |
| H | -2.70797300 | -0.10307600 | 1.20739900  |
| H | -2.69908200 | 1.09881400  | -0.51624500 |
| H | -2.70051200 | -0.99558500 | -0.69521800 |

---



---

H<sub>3</sub>P-H<sub>2</sub>-BF<sub>3</sub>

|   |             |             |             |
|---|-------------|-------------|-------------|
| P | -1.90800400 | -0.00365100 | -0.13460200 |
| B | 1.04412500  | 0.01359900  | -0.24256300 |
| H | -0.78677600 | 0.09943700  | -1.10030200 |
| H | 0.54215100  | -0.00548600 | -1.43351000 |
| H | -1.61815300 | 0.63796400  | 1.07859000  |
| H | -3.12028900 | 0.58438900  | -0.57253200 |
| H | -2.27491700 | -1.32944700 | 0.14893300  |
| F | 0.77952200  | 1.27815400  | 0.31548600  |
| F | 2.36840000  | -0.32949000 | -0.27263600 |
| F | 0.25845800  | -0.94867400 | 0.52500100  |

---



---

H<sub>3</sub>PH-HBF<sub>3</sub>

|   |             |             |             |
|---|-------------|-------------|-------------|
| P | 1.62794200  | 0.00887700  | -0.16652900 |
| B | -1.35439300 | -0.01979900 | 0.26665100  |
| H | 0.66460100  | 0.89566300  | -0.70704200 |
| H | -2.38570200 | -0.01563800 | 0.90393600  |
| H | 1.22648500  | -1.33108800 | -0.17799700 |
| H | 2.76683100  | 0.03632900  | -1.01643400 |
| H | 2.15398400  | 0.40358000  | 1.06996700  |
| F | -1.14790400 | 1.15934600  | -0.52452100 |
| F | -1.13082900 | -1.14233500 | -0.55921500 |
| F | -0.17386300 | -0.01956800 | 1.20509700  |
